# Supplementary material for: A Lipidomic Analysis of Leaves of Esca-Affected Grapevine Suggests a Role for Galactolipids in the Defense Response and Appearance of Foliar Symptoms
Source: Biology (Basel). 2020 Sep 4;9(9):268. doi: 10.3390/biology9090268 (PMC7563498; doi:10.3390/biology9090268)
Supplement: Supplementary file 1 [file biology-09-00268-s001.xlsx]

## Sheet: TableS1 Changes in lipid levels
	Piebiep Goufo and Isabel Cortez A lipidomic analysis of leaves of esca-affected grapevine suggests a role for galactolipids in the triggering of foliar symptom appearance
	Lipid species					Scaled Imputed Replicate Data																									Mean Values (Scaled Imputed Data)					Log2 Fold of Change				Statistical Values (From log-trasnfromed Scaled Imputed Data)				Statistical Values (From log-trasnfromed Scaled Imputed Data)				Statistical Values (From log-trasnfromed Scaled Imputed Data)
						Control	Control	Control	Control	Control	Control	Asymp	Asymp	Asymp	Asymp	Asymp	Asymp	Symp_level1	Symp_level1	Symp_level1	Symp_level1	Symp_level1	Symp_level1	Symp_level2	Symp_level2	Symp_level2	Symp_level2	Symp_level2	Symp_level2											ASY / CTL	SY1 / CTL	SY2 / CTL		ASY / CTL	SY1 / CTL	SY2 / CTL		ASY / CTL	SY1 / CTL
	Compound No	Sub-pathway	Lipid Name	Abbreviation		CTL	CTL	CTL	CTL	CTL	CTL	ASY	ASY	ASY	ASY	ASY	ASY	SY1	SY1	SY1	SY1	SY1	SY1	SY2	SY2	SY2	SY2	SY2	SY2		CTL	ASY	SY1	SY2		ASY / CTL	SY1 / CTL	SY2 / CTL		P-value	P-value	P-value		Log10(p-value)	Log10(p-value)	Log10(p-value)		q-value	q-value
	123	Fatty acids, free saturated	caproic acid	CAPo		0.4082	0.7612	1.0802	0.6909	1.2684	0.8836	0.6334	1.0044	0.2934	0.5961	0.5548	0.8569	0.9956	1.1357	1.4815	1.1852	0.8712	0.9518	1.2177	1.2316	1.251	1.3622	1.4	1.6161		0.8487	0.6565	1.1035	1.3464		-0.37046	0.37876	0.66578		0.2913	0.1296	0.0231		0.53566	0.887395	1.63639		0.4123	0.1725
	124		caprylic acid	CAPy		1.13332	1.83132	0.821268	1.40488	0.977296	1.6181	0.503868	0.926621	1.05147	1.0845	0.777669	1.00556	0.600978	1.08714	0.814142	0.798107	0.70756	0.942626	9.82612	9.88414	6.3639	6.32002	8.09501	8.10208		1.295	0.89	0.825	8.0975		-0.541075	-0.650486	2.64452		0.159942	0.0941837	0.005513		0.796037	1.02602	2.25861		0.112523	0.0689249
	125		capric acid	CAPi		0.961599	1.53395	0.46025	1.16966	0.710924	1.35181	0.342054	0.738338	0.579667	0.847358	0.46086	0.792848	0.414169	0.87954	0.541404	0.778634	0.477787	0.829087	5.70829	6.36751	3.76114	4.14271	4.73472	5.25511		1.03	0.6275	0.6525	4.995		-0.714957	-0.658595	2.27784		0.157698	0.178998	0.0009728		0.802173	0.747152	3.01198		0.169248	0.128464
	126		undecanoic acid	UDA		1.22241	1.28704	1.09829	1.14924	1.16035	1.21814	0.360128	0.353457	0.495	0.651199	0.427564	0.502328	0.386008	0.326146	0.459208	0.500361	0.422608	0.413253	0.912213	1.00812	1.09488	1.63078	1.00355	1.31945		1.19	0.465	0.42	1.16		-1.35566	-1.5025	-0.0368368		0.0001148	9.2e-06	0.862684		3.94006	5.03621	0.0641482		1e-06	6.8e-06
	127		lauric acid	LAU		0.650086	0.406243	0.562296	0.750821	0.606191	0.578532	0.178332	0.299235	0.164243	0.546767	0.171288	0.423001	0.158698	0.210005	0.134022	0.133883	0.14636	0.171944	0.505808	0.66385	1.06313	0.76667	0.784468	0.71526		0.5925	0.2975	0.1575	0.75		-0.993925	-1.91146	0.340075		0.0427243	0.0011184	0.293508		1.36933	2.9514	0.53238		0.0201588	0
	128		tridecanoic acid	TDA		0.241198	0.226652	0.464762	0.508822	0.35298	0.367737	0.49008	0.496932	0.275279	0.324188	0.382679	0.41056	0.41099	0.415304	0.332987	0.382131	0.371988	0.398718	0.33588	0.361502	0.159213	0.167057	0.247546	0.26428		0.36	0.3975	0.385	0.2575		0.142958	0.0968615	-0.483424		0.699239	0.752323	0.300588		0.155374	0.123596	0.522029		0.569528	0.816095
	129		myristic acid	MYR		1.25798	1.33665	0.967203	1.09061	1.11259	1.21363	0.587698	0.604457	0.691622	0.753947	0.63966	0.679202	0.483841	0.50004	0.594001	0.612252	0.538921	0.556146	0.494612	0.371462	4.85112	4.73767	2.67287	2.55457		1.165	0.6575	0.545	2.6125		-0.825267	-1.096	1.1651		0.0014623	0.000444	0.334326		2.83496	3.35262	0.47583		0	2.1e-06
	130		pentadecanoic acid	PDA		0.846911	0.913887	0.976922	0.97181	0.911916	0.942849	0.516431	0.466771	0.553591	0.905754	0.535011	0.686262	0.63454	0.655209	0.614727	0.583248	0.624634	0.619228	0.592342	0.421088	0.773512	1.14971	0.682927	0.785401		0.9275	0.6125	0.62	0.7325		-0.598637	-0.581079	-0.340519		0.0239555	0.000111	0.302842		1.62059	3.95468	0.518784		3.1e-06	3.2e-06
	131		palmitic acid	PAM		12.559	13.3084	12.9563	12.9987	12.7576	13.1535	11.3921	10.0786	10.5098	10.7662	10.9509	10.4224	14.1442	14.4004	15.349	15.0888	14.7466	14.7446	10.8438	9.25484	10.6207	10.4116	10.7322	9.83321		12.9575	10.6875	14.745	10.28		-0.277863	0.186438	-0.333947		0.0003568	0.0014743	0.000447		3.44758	2.83141	3.34969		5.1e-06	1.39e-05
	132		heptadecanoic acid	HDA		0.651767	0.724953	1.05737	1.18862	0.854569	0.956786	1.38575	1.91688	0.955625	1.56859	1.17069	1.74273	1.69438	1.70001	1.72452	1.75294	1.70945	1.72647	0.517528	0.454086	0.45873	0.462428	0.488129	0.458257		0.905	1.46	1.715	0.4725		0.689979	0.922219	-0.937603		0.0589489	0.0080615	0.0441941		1.22952	2.09358	1.35464		0.0950855	9e-07
	133		stearic acid	STE		0.582909	0.52879	0.556125	0.755294	0.569517	0.642042	3.68517	3.61671	5.04641	4.66485	4.36579	4.14078	0.119106	0.173871	0.13713	0.125894	0.128118	0.149882	0.264728	2.4155	1.14903	0.985232	0.706879	1.70036		0.6075	4.255	0.14	1.205		2.8082	-2.11746	0.988077		0.0017019	0.0022009	0.275735		2.76907	2.6574	0.559508		0.0001217	0.0011422
	134		arachidic acid	ACH		2.43831	2.23402	1.95851	2.40983	2.19841	2.32193	0	0	0.0686924	0.193639	0.0343462	0.0968194	1.6533	1.5993	0.652428	0.666244	1.15286	1.13277	4.78341	4.4552	4.40704	4.47275	4.59523	4.46398		2.26	0.065	1.1425	4.53		-5.11974	-0.984129	1.00319		1.6e-06	0.0097639	3.3e-06		5.79588	2.01038	5.48149		1.07e-05	2e-06
	135		heneicosanoic acid	HEA		0.846462	0.770736	0.621264	0.504642	0.733863	0.637689	0.478917	0.592238	0.461858	1.31926	0.470388	0.955751	0.555834	0.581577	0.611791	0.56816	0.583813	0.574868	0.917235	0.897345	0.482088	2.12082	0.699661	1.50908		0.685	0.7125	0.58	1.105		0.056786	-0.240051	0.68987		0.904111	0.27123	0.322812		0.0437783	0.566662	0.49105		0.705813	0.397463
	136		behenic acid	BEH		0.814975	1.06063	0.789528	0.294652	0.802252	0.67764	0.18932	0.26791	0.213712	0.230397	0.201516	0.249153	0.11585	0.21071	0.131129	0.214425	0.12349	0.212568	0.317255	0.500161	0.814994	0.992625	0.566124	0.746393		0.7375	0.225	0.1675	0.655		-1.71272	-2.13848	-0.171148		0.0493752	0.0369381	0.72146		1.30649	1.43253	0.141788		0.0258524	0.0351884
	137		tricosanoic acid	TEA		0.393929	0.254978	0.260091	0.166026	0.32701	0.210502	0.38025	0.338368	0.361609	0.40723	0.37093	0.372799	0.19718	0.120187	0.159035	0.165123	0.178108	0.142655	0	0	0.443699	0	0.221849	0		0.2675	0.3725	0.1625	0.11		0.477702	-0.719099	-1.28204		0.0709391	0.0732731	0.234027		1.14911	1.13506	0.630734		0.0500874	0.0517318
	138		lignoceric acid	LIG		0.348659	0.443076	0.410769	0.387969	0.379714	0.415522	0.384152	0.411451	0.222599	0.257414	0.303376	0.334432	0.202328	0.165567	0.175345	0.198013	0.188837	0.18179	0.84127	0.405672	0.584735	0.387945	0.713002	0.396809		0.3975	0.3175	0.1875	0.555		-0.324198	-1.08406	0.481533		0.158059	4.79e-05	0.227951		0.801182	4.31966	0.642159		0.102327	0
	139	Fatty acids, free unsaturated	myristoleic acid	ΔMYR		3.14443	1.57319	2.30966	2.05611	2.72704	1.81465	0.468419	0.536196	0.744282	0.480319	0.60635	0.508258	0.517958	0.91231	0.549677	0.836294	0.533818	0.874302	2.03935	1.42929	1.57131	1.81462	1.80533	1.62196		2.27	0.5575	0.705	1.7125		-2.02565	-1.687	-0.406588		0.0120768	0.0038355	0.167035		1.91805	2.41618	0.777193		1.25e-05	4.3e-06
	140		cis-10-pentadecenoic acid	cisPDA		0.795814	0.528544	0.610311	0.555865	0.703062	0.542204	0.409138	0.403562	0.307638	0.367329	0.358388	0.385445	0.284188	0.373266	0.275975	0.47711	0.280081	0.425188	1.4357	1.8386	1.40071	1.63394	1.41821	1.73627		0.625	0.3725	0.3525	1.5775		-0.746616	-0.826233	1.33571		0.0079391	0.0122442	0.0001907		2.10023	1.91207	3.71965		1.73e-05	2.51e-05
	141		palmitoleic acid	ΔPAM		2.04478	1.33464	1.57073	2.52797	1.80775	1.93131	1.88013	1.77094	2.14724	2.50731	2.01369	2.13913	1.89756	2.08299	0.57051	0.749565	1.23404	1.41628	6.41332	5.70868	5.29557	4.65883	5.85445	5.18376		1.8675	2.0775	1.325	5.52		0.15374	-0.495116	1.56356		0.526611	0.292007	0.0001948		0.27851	0.534607	3.71041		0.630082	0.119281
	142		cis-10-heptadecenoic acid	cisHDA		0.400428	0.398031	0.437573	0.444252	0.419	0.421141	0.408438	0.455159	0.40822	0.503373	0.408329	0.479266	0.379674	0.393756	0.455671	0.398283	0.417673	0.396019	0.480277	0.596902	0.346723	0.344607	0.4135	0.470755		0.42	0.445	0.4075	0.4425		0.083416	-0.0435893	0.0752881		0.349887	0.579736	0.741231		0.456072	0.236769	0.130046		0.266066	0.320003
	143		oleic acid	OLE		1.86992	1.98204	2.4252	2.4542	2.14756	2.21812	0.416452	0.397149	1.81494	1.74906	1.11569	1.0731	2.66589	2.68294	2.85722	2.76818	2.76156	2.72556	2.77399	2.68383	2.01816	2.88229	2.85108	2.78306		2.1825	1.095	2.745	2.665		-0.995051	0.330824	0.288154		0.0011343	0.0901685	0.24766		2.94527	1.04495	0.606144		0.0007723	0.0508653
	144		elaidic acid	ΔOLE		5.86081	5.65824	4.44083	5.67605	5.15082	5.66715	3.0626	3.00531	3.70107	3.3955	3.38183	3.2004	6.04468	3.57427	4.43233	4.47959	5.23851	4.02693	3.78728	2.1529	2.79611	2.74854	3.2917	2.45072		5.41	3.2925	4.63	2.8725		-0.716445	-0.224616	-0.913322		0.0423925	0.0115521	0.0619842		1.37271	1.93734	1.20772		0.001012	0.0001417
	145		cis-11-eicosenoic acid	EMA		1.49655	0.741083	0.457589	0.495416	0.977069	0.61825	0.488366	0.467148	0.470471	0.675189	0.479419	0.571168	0.351992	0.412176	0.291514	0.816408	0.321753	0.614292	1.52151	2.76444	2.49016	3.53255	2.00583	3.14849		0.8	0.5275	0.4675	2.575		-0.600829	-0.775034	1.6865		0.344008	0.263549	0.0101205		0.463432	0.579138	1.9948		0.210013	0.175684
	146		erucic acid	ERU		1.28482	1.42188	1.29455	0.393872	1.28969	0.907874	0.338432	0.504395	0.495235	0.323989	0.416833	0.414192	0.294862	0.295564	0.239517	0.14502	0.267189	0.220292	1.48174	1.19943	1.17663	1.14398	1.32919	1.17171		1.095	0.415	0.245	1.25		-1.39975	-2.16008	0.190997		0.0613129	0.0357368	0.557365		1.21245	1.44688	0.25386		0.00859588	0.032022
	147		nervonic acid	NER		0.569911	0.165084	0.205134	1.12893	0.387522	0.647005	0.233466	0.175195	0.149639	0.446413	0.191553	0.310804	0.16271	0.13315	0	0.272172	0.0813551	0.202661	0.354401	1.43163	1.04676	1.00683	0.700581	1.21923		0.52	0.2525	0.14	0.96		-1.04223	-1.89308	0.884523		0.293635	0.185714	0.212967		0.532191	0.731155	0.671687		0.101012	0.100142
	148		linolelaidic acid	ΔLA		0.265906	0.271943	0.299698	0.317422	0.282802	0.294683	0	0	0.267272	0.243263	0.133636	0.121632	0.329054	0.325534	0.346254	0.328053	0.337654	0.326793	0.186356	0	0.209277	0.205752	0.197816	0.102876		0.29	0.1275	0.335	0.1525		-1.18556	0.208108	-0.927244		0.113735	0.014466	0.0706756		0.944107	1.83965	1.15073		0.0705407	0.0014093
	149		linoleic acid	LA		5.71239	5.01522	5.57919	5.52862	5.64579	5.27192	8.20266	8.15309	5.36525	4.44725	6.78395	6.30017	6.58906	6.6715	7.4353	7.23329	7.01218	6.95239	5.12557	4.85836	5.77985	5.64683	5.45271	5.2526		5.46	6.5425	6.9825	5.355		0.260941	0.354843	-0.0280144		0.343544	0.0010484	0.704985		0.464018	2.97947	0.15182		0.150252	0.0014388
	150		γ-linolenic acid	GLA		40.247	43.4347	48.0954	46.7974	44.1712	45.1161	57.1193	56.6397	57.4919	53.9751	57.3056	55.3074	53.1967	53.513	55.8881	54.4781	54.5424	53.9956	22.2482	20.9861	22.44	21.8266	22.3441	21.4063		44.645	56.3075	54.27	21.8775		0.334828	0.281656	-1.02905		0.0009435	0.0020962	0.0007623		3.02526	2.67857	3.11787		0.0038889	0.002225
	151		cis-11,14-eicosadienoic acid	EDA		1.44075	0.935082	0.666232	0.80824	1.05349	0.871661	0.394738	0.198976	0.486641	0.707139	0.44069	0.453057	0.419166	0.338473	0.39793	0.624518	0.408548	0.481495	1.21503	2.66216	2.10438	2.12888	1.6597	2.39552		0.965	0.4475	0.445	2.0275		-1.10864	-1.11672	1.0711		0.0402418	0.0267698	0.0209836		1.39532	1.57235	1.67812		0.0039263	0.0003567
	152		cis-8,11,14-eicosatrienoic acid	ETA(1)		0.740234	1.30941	1.56282	0.516558	1.15153	0.912984	0.263036	0.544331	0.133763	0.283508	0.1984	0.41392	0.250248	0.197584	0.1618	0.395786	0.206024	0.296685	0	0	0	0	0	0		1.0325	0.3025	0.2525	0		-1.77113	-2.03179	-1		0.0295045	0.0454088	0.0236578		1.53011	1.34286	1.62603		0.0039496	0.0001437
	153		arachidonic acid	ARA		0.301091	0.347134	0.289864	0.265686	0.295478	0.30641	0.806956	0.710178	0.310829	0.538733	0.558892	0.624455	0.675419	0.619404	0.550578	0.650331	0.612998	0.634867	0.485404	0.45677	1.42401	0.450498	0.954709	0.453634		0.3025	0.5925	0.625	0.705		0.96988	1.04692	1.22069		0.0753119	6.19e-05	0.189956		1.12314	4.20831	0.721347		0.040809	0
	154		cis-13,16-docosadienoic acid	DDA		0.504695	0.545461	0.156579	0.337259	0.330637	0.44136	0.957677	0.479859	0.215572	0.304572	0.586624	0.392216	0.407381	0.467905	0.300301	0.0706428	0.353841	0.269274	0.555406	0.553252	1.81167	0.626361	1.18354	0.589807		0.3875	0.49	0.3125	0.8875		0.338585	-0.31034	1.19555		0.604828	0.569303	0.169603		0.218368	0.244656	0.770567		0.608065	0.300169
	155		α-linolenic acid	ALA		4.03717	2.88904	2.25204	1.09369	3.1446	1.99137	1.52845	1.4864	1.23306	2.1883	1.38076	1.83735	1.46543	1.55834	1.19799	1.18753	1.33171	1.37294	5.7244	5.74696	4.16691	5.57553	4.94565	5.66125		2.5675	1.61	1.355	5.305		-0.673304	-0.922071	1.04699		0.190693	0.142853	0.009169		0.719666	0.845109	2.03768		0.108864	0.104135
	156		cis-11,14,17-eicosatrienoic acid	ETA(2)		2.55653	2.94269	1.18437	0.703594	1.87045	1.82314	0.570865	1.51607	1.54203	0.5628	1.05645	1.03944	0.305107	0.972839	0.364258	0.377833	0.334683	0.675336	1.91828	2.33504	2.45607	1.272	2.18718	1.80352		1.845	1.0475	0.505	1.9975		-0.816671	-1.86927	0.114575		0.235655	0.053611	0.808069		0.627724	1.27075	0.0925516		0.160778	0.0004094
	157		cis-5,8,11,14,17-eicosapentaenoic acid	EPA		1.04906	0.781702	0.608537	0.675324	0.828797	0.728513	0.215496	0.23432	0.132765	0.387107	0.17413	0.310714	0.266473	0.262253	0.0996861	0.0687758	0.18308	0.165514	0.717905	0.852569	0.618599	1.0526	0.668252	0.952586		0.78	0.2425	0.175	0.81		-1.68549	-2.15612	0.0544478		0.0028274	0.0015015	0.830174		2.54861	2.82347	0.0808311		0	7.49e-05
	158		cis-4,7,10,13,16,19-docosahexaenoic acid	DHA		0.728245	0.863629	1.59275	1.4719	1.1605	1.16777	1.36122	1.21398	0.931057	1.39244	1.14614	1.30321	1.72501	1.18774	1.1545	1.07432	1.43976	1.13103	5.67533	5.28265	3.90919	3.70077	4.79226	4.49171		1.1625	1.2225	1.285	4.6425		0.0726037	0.144538	1.99767		0.810572	0.657297	0.000643		0.0912083	0.182238	3.19179		0.0708849	0.0325779
	001	Fatty acid, hydroxy	2-hydroxybutyrate/2-hydroxyisobutyrate	2-HBA		0.6015	1.049	1.0501	0.7118	0.9256	1.1406	0.8519	1.0788	1.0836	0.8607	1.1485	0.9062	0.951	0.9186	0.7715	0.9198	0.8819	0.7125	1.3025	1.8111	1.159	1.3125	1.2732	1.5236		0.9131	0.9883	0.8592	1.397		0.114176	-0.0877789	0.613487		0.4304	0.7294	0.0064		0.366128	0.137034	2.19382		0.4376	0.4793
	002		2S,3R-dihydroxybutyrate	2S,3R-HBA		0.9141	1.059	1.1599	1.0022	1.0735	1.1668	0.8309	0.9397	1.147	0.8781	0.9843	1.1572	0.8075	0.9011	0.7594	0.8813	0.9978	0.6952	1.0521	1.1821	1.0418	0.9114	1.0283	1.2745		1.0626	0.9895	0.8404	1.0817		-0.102827	-0.338451	0.0257018		0.2917	0.0052	0.8033		0.535064	2.284	0.0951222		0.4123	0.022
	003		2,3-dihydroxy-2-methylbutyrate	2,3-2m-HBA		0.5937	1.1846	0.8622	1.0225	0.9433	1.1552	0.9632	1.0141	1.27	0.9344	0.9638	1.1193	1.0374	0.8675	0.9018	1.0424	0.9859	0.8496	1.3092	1.1285	1.1683	0.8507	0.94	1.1341		0.9603	1.0442	0.9474	1.0885		0.120841	-0.0195115	0.180784		0.3983	0.9447	0.2823		0.39979	0.0247061	0.549289		0.432	0.544
	004		3-hydroxybutyrate (BHBA)	3-HBA		0.6791	0.7867	0.6791	0.7834	0.7467	0.9262	0.6791	0.6791	0.6791	0.6791	0.6791	0.9767	1.0673	1.3472	0.6791	0.9462	1.0037	0.6791	1.6826	1.8287	1.0211	0.9963	1.1758	1.3283		0.7669	0.7287	0.9538	1.3388		-0.0737135	0.314648	0.80383		0.489	0.149	0.0022		0.310691	0.826814	2.65758		0.4616	0.1876
	005		2,4-dihydroxybutyrate	2,4-HBA		0.9054	1.3471	0.9628	1.2206	1.4242	1.3705	1.3154	1.3138	1.0372	1.8009	1.0885	1.642	1.5627	0.8487	0.836	0.7936	1.7809	0.7111	0.6399	0.5739	0.9189	0.6235	0.843	0.5711		1.2051	1.3663	1.0888	0.6951		0.181121	-0.146414	-0.79386		0.3356	0.4152	0.0007		0.474178	0.381743	3.1549		0.4263	0.3395
	006		3-hydroxyadipate*	3-HAA		1.3528	0.8004	0.8542	0.7003	1	1.2005	0.4428	2.8792	0.4428	1.1232	1.3446	0.8614	1.108	0.7812	0.9393	0.9649	0.4428	1.2013	0.7371	1.2331	0.4428	1.0276	0.4428	0.4428		0.9847	1.1823	0.9063	0.721		0.26384	-0.119696	-0.449685		0.9764	0.5768	0.1199		0.0103722	0.238975	0.921181		0.6136	0.4202
	007		2R,3R-dihydroxybutyrate	2R,3R-HBA		0.8839	1.3482	1.3779	1.4421	1.2777	1.1161	1.1672	1.1517	1.2807	1.458	1.2119	1.775	0.8312	0.8381	0.8779	0.7786	1.144	0.7204	0.6736	0.6128	0.8023	0.5605	0.6402	0.709		1.241	1.3407	0.865	0.6664		0.111483	-0.520731	-0.897043		0.4568	0.0047	8.5075e-05		0.340274	2.3279	4.0702		0.4457	0.022
	008	Fatty acid amide, amino	linolenoyl ethanolamide	N,N-lea		0.6735	1.3722	0.8475	0.4394	0.8797	1.5131	0.7793	0.7427	0.6637	0.6322	0.8417	0.7853	1.8359	1.1777	1.2129	1.1328	1.4077	0.4394	1	1.063	0.8288	1.0743	1.2222	2.2041		0.9542	0.7408	1.2011	1.2321		-0.365208	0.331993	0.368756		0.4003	0.4154	0.2474		0.397614	0.381534	0.6066		0.432	0.3395
	009		N,N-dimethyl-5-aminovalerate	N,N-dav		1.0636	0.8137	0.8711	0.9484	0.9775	1.1144	1.2088	1.2787	1.0307	0.8497	1.1902	1.0136	0.6439	1.1394	0.9137	0.9803	0.9864	1.1772	1.3457	1.5312	0.8613	0.5931	0.6472	1.0743		0.9648	1.0953	0.9735	1.0088		0.183024	0.0129511	0.0643384		0.1481	0.9739	0.9518		0.829445	0.0114856	0.0214543		0.3075	0.5513
	010		N,N,N-trimethyl-5-aminovalerate	N,N,N-tav		1.1514	0.7493	0.8972	0.9409	0.8804	0.7208	1.2931	1.021	1.0117	1.7898	0.9291	0.9883	0.5254	1.02	0.846	0.8598	0.8212	0.8574	2.1364	1.9416	1.9244	1.2924	1.4993	2.5248		0.89	1.1722	0.8216	1.8865		0.397342	-0.115369	1.08383		0.0638	0.466	0.0002		1.19518	0.331614	3.69897		0.2148	0.366
	011	Fatty acid, Dicarboxylate	malonate	MaA		0.8399	1.0733	0.7902	0.8228	0.9332	0.928	1.1453	0.7194	1.0488	0.7435	1.0627	0.9615	0.8804	1.2146	1.1512	1.0222	1.0037	0.9963	1.245	1.1743	0.9901	1.2052	0.9873	1.1227		0.8979	0.9469	1.0447	1.1208		0.0766573	0.218462	0.319902		0.6546	0.0432	0.0046		0.184024	1.36452	2.33724		0.5369	0.0842
	012		dimethylmalonate	dmMaA		2.0217	0.511	0.787	1.1768	0.5368	0.6588	0.4214	0.4125	0.3652	0.605	0.6415	0.6362	1.219	1.0915	1.6041	0.9085	1.2319	0.7045	3.2737	3.2546	2.164	3.0768	1.5778	1.4607		0.9487	0.5136	1.1266	2.4679		-0.885307	0.247952	1.37926		0.0686	0.3078	0.0036		1.16368	0.511731	2.4437		0.2161	0.2933
	013		ethylmalonate	eMaA		1.1269	0.512	0.565	1.0712	0.5016	1.1372	1.3003	1.145	1.393	1.4774	0.6625	0.6821	0.5797	0.6171	0.742	0.6393	0.66	0.5458	1.2037	1.4309	1.8987	1.1729	0.9288	1.67		0.819	1.11	0.6306	1.3842		0.438624	-0.377138	0.757117		0.1796	0.3034	0.0206		0.745694	0.517984	1.68613		0.3316	0.2933
	014		glutarate	GlA		0.8133	1.0574	0.9798	1.3712	1.12	1.6114	0.9954	0.9803	0.8441	0.9592	0.9902	1.2288	0.7601	1.0012	0.9988	0.6807	1.0658	0.9264	1.1354	1.75	1.4061	1.0882	0.8351	1.163		1.1589	0.9997	0.9055	1.2296		-0.213189	-0.35597	0.085433		0.2813	0.0886	0.6927		0.55083	1.05257	0.159455		0.4123	0.1388
	015		3-methylglutarate/2-methylglutarate	dmGlA		0.623	1.1478	0.8461	0.6687	0.7205	1.0929	0.9889	0.8121	0.8678	1.1073	1.0111	0.9783	0.9612	1.2032	1.2695	0.9386	0.9595	0.7283	1.6648	2.2792	1.5136	2.0403	1.6323	1.4838		0.8498	0.9609	1.01	1.769		0.177263	0.24916	1.05774		0.2446	0.197	0.0002		0.611544	0.705534	3.69897		0.396	0.2221
	016		adipate	AdA		0.9661	1.4042	0.8651	0.639	0.8703	1.3857	0.6853	0.7606	0.5956	1.3807	0.6596	0.8617	1.448	1.2247	1.0339	1.1168	0.5538	0.6688	1.8255	2.2745	1.8196	2.2887	1.4999	0.8961		1.0217	0.8239	1.0077	1.7674		-0.31043	-0.0199054	0.790657		0.2392	0.8841	0.0171		0.621239	0.0534986	1.767		0.3939	0.5309
	017		suberate	SuA		0.7512	1.1324	0.7147	0.8101	0.9863	1.1355	0.8702	0.7116	1.0815	0.8944	0.9619	1.0022	0.9483	1.0189	0.9598	0.8996	0.9978	1.0247	2.5043	3.4011	1.9418	2.4749	2.0564	1.9033		0.9217	0.9203	0.9749	2.3803		-0.00219302	0.080957	1.36877		0.9427	0.4353	1.7074e-05		0.0256265	0.361211	4.76766		0.6018	0.3544
	018		azelate	AzA		0.9329	1.3067	0.7959	0.893	1.1831	1.0884	0.4426	0.9209	0.7643	0.9508	0.8952	0.7324	0.9826	1.1115	1.1608	1.0174	0.8473	0.8433	3.7099	6.5541	2.1348	3.1926	3.602	3.9862		1.0334	0.7844	0.9938	3.8633		-0.397737	-0.0563713	1.90243		0.0674	0.7419	8.3745e-05		1.17134	0.129655	4.07704		0.2148	0.4832
	019		sebacate	SeA		0.5135	1.1044	0.8034	0.8213	1.2126	1.094	0.7478	0.7997	0.8524	0.893	1.044	0.8199	0.8951	1.0225	1.2989	0.9775	0.6987	0.8136	2.3108	3.9766	1.6196	5.5933	2.2503	1.9862		0.9249	0.8595	0.951	2.9561		-0.1058	0.040148	1.67633		0.7792	0.7671	0.0011		0.108351	0.115148	2.95861		0.5659	0.4917
	020	Phospholipids	1-palmitoyl-2-linoleoyl-GPA (16:0/18:2)*	34:2-GPA		0.7467	0.6394	0.569	0.254	0.254	0.7287	0.254	0.4267	0.254	0.8987	0.254	1	3.2012	1.0427	0.9848	1.4417	2.1825	0.254	2.7325	1.9665	2.7822	0.5936	3.0929	3.0394		0.532	0.5146	1.5178	2.3678		-0.0479748	1.51248	2.15405		0.7324	0.0636	0.0015		0.135252	1.19654	2.82391		0.5594	0.1123
	021		1-palmitoyl-2-linolenoyl-GPA (16:0/18:3)*	34:3-GPA		1	0.9899	0.9379	0.5391	0.8963	0.9598	0.3872	0.3872	0.6191	1.2254	0.7589	1.2538	2.7846	0.6774	1.054	1.3194	1.7939	0.5219	1.2085	1.4593	1.7688	0.8161	1.9375	1.9962		0.8872	0.7719	1.3585	1.5311		-0.200845	0.614683	0.787237		0.3601	0.3216	0.0137		0.443577	0.492684	1.86328		0.4263	0.2993
	022		1-linoleoyl-2-linolenoyl-GPA (18:2/18:3)*	36:5-GPA		0.4268	0.7581	1.0328	0.1645	0.4779	0.9672	0.1645	0.6358	0.1645	1.4984	0.4235	1.0557	2.7443	0.8326	0.5584	0.8792	1.5083	0.3258	1.2246	1.7976	1.9916	1.3044	2.7638	1.7932		0.6379	0.6571	1.1414	1.8125		0.0427827	0.839402	1.50658		0.7859	0.2436	0.0068		0.104633	0.613323	2.16749		0.5666	0.2538
	023		1,2-dilinolenoyl-GPA (18:3/18:3)*	36:6-GPA		1.0018	0.9966	1.012	0.6194	1.0842	1.5018	0.3415	0.8861	0.6676	1.2043	0.9982	1.1008	2.6251	0.6418	0.9155	1.0495	1.454	0.3796	0.9162	0.9853	1.1249	0.6602	1.6225	1.1311		1.036	0.8664	1.1776	1.0734		-0.257919	0.184826	0.0511638		0.3451	0.9431	0.8546		0.462055	0.0254423	0.0682371		0.4263	0.544
	024		1-myristoyl-2-arachidonoyl-GPC (14:0/20:4)*	34:4-GPC(1)		1.1168	0.7896	1.0739	0.7253	0.8516	0.9208	0.6809	1.3418	0.9465	1.4649	1.2221	1.293	0.8131	0.9228	0.9023	0.8724	1.0535	0.5107	1.1407	1.3428	1.2091	0.6054	1.6562	1.6761		0.913	1.1582	0.8458	1.2717		0.343198	-0.110298	0.478072		0.1453	0.4954	0.1248		0.837734	0.305044	0.903785		0.3073	0.3773
	025		1,2-dipalmitoyl-GPC (16:0/16:0)	32:0-GPC		0.9214	0.4112	0.8343	0.5165	0.551	0.5159	0.4988	1.1965	0.757	1.4168	0.8309	1.2946	0.9795	1.1227	1.0205	1.0604	1.457	0.3644	1.5693	2.4487	2.121	0.6595	2.5387	1.8708		0.625	0.9991	1.0008	1.868		0.676773	0.679226	1.57957		0.0562	0.0963	0.0021		1.25026	1.01637	2.67778		0.206	0.144
	026		1-palmitoyl-2-oleoyl-GPC (16:0/18:1)	34:1-GPC		0.9994	0.6998	1.2502	0.6358	0.6236	0.5839	0.86	1.0181	0.8765	1.322	0.8115	1.309	0.5501	1.0967	1.0006	0.8095	1.0593	0.4174	1.0925	1.3403	1.4442	0.7098	1.4885	2.195		0.7988	1.0329	0.8223	1.3784		0.370794	0.0418305	0.787088		0.102	0.9587	0.0235		0.9914	0.0183173	1.62893		0.2689	0.5475
	027		1-palmitoyl-2-linoleoyl-GPC (16:0/18:2)	34:2-GPC		0.8939	0.8429	0.8177	0.8455	0.8702	0.8206	0.6877	1.0446	0.9761	1.1155	0.9524	1.0239	0.9129	1.0331	1.2249	1.1955	1.1986	0.5415	1.3195	1.0545	1.2765	0.6452	1.4126	1.4557		0.8485	0.9667	1.0177	1.194		0.188154	0.262326	0.492816		0.1482	0.3046	0.0571		0.829152	0.51627	1.24336		0.3075	0.2933
	028		1-palmitoyl-2-alpha-linolenoyl-GPC (16:0/18:3n3)*	34:3-GPC		0.8855	0.9347	0.8422	0.9897	1.0214	1.0516	0.7258	1.2616	1.1431	1.2688	1.1546	1.083	0.973	0.9381	1.0814	1.0344	1.0103	0.5696	0.9444	0.8662	0.9851	0.6043	1.066	1.0143		0.9542	1.1062	0.9345	0.9134		0.213249	-0.030097	-0.0630449		0.188	0.72	0.5539		0.725842	0.142668	0.256569		0.3406	0.4755
	029		1-palmitoleoyl-2-linolenoyl-GPC (16:1/18:3)*	34:4-GPC(2)		0.9425	0.9403	0.7781	0.9583	0.9822	1.082	0.6213	1.1299	1.1027	1.1369	1.0263	1.0864	0.9176	0.7132	1.0815	1.0178	0.851	0.5255	1.1299	0.9236	1.1328	0.5775	1.1121	1.1517		0.9472	1.0173	0.8511	1.0046		0.103004	-0.15434	0.0848802		0.6127	0.3066	0.7681		0.212752	0.513428	0.114582		0.5254	0.2933
	030		1-stearoyl-2-oleoyl-GPC (18:0/18:1)	36:1-GPC		0.9623	0.7567	1.0762	0.7794	0.6906	0.7754	0.8148	0.8333	1.1203	1.1541	0.9681	1.095	0.6884	1.0319	1.5402	1.1167	0.937	0.4822	1.5043	1.4452	1.491	0.789	1.6197	2.454		0.8401	0.9976	0.9661	1.5505		0.2479	0.201611	0.884101		0.0895	0.6407	0.0098		1.04818	0.193345	2.00877		0.2509	0.4433
	031		1-stearoyl-2-linoleoyl-GPC (18:0/18:2)*	36:2-GPC		0.9264	0.8299	0.7879	0.7483	0.8429	0.7934	0.7249	0.9677	1.0189	1.0743	0.9922	1.0444	0.8943	1.0435	1.2763	1.3067	1.2132	0.4685	1.2765	1.0078	1.1953	0.5621	1.4459	1.5121		0.8215	0.9704	1.0337	1.1666		0.240319	0.331485	0.505977		0.0427	0.3161	0.0962		1.36957	0.500176	1.01682		0.1947	0.2985
	032		1-oleoyl-2-linoleoyl-GPC (18:1/18:2)*	36:3-GPC		0.8918	1.2097	0.9951	0.8084	0.8844	0.8634	0.8716	0.8371	1.0049	0.8596	1.0499	0.9434	0.8039	1.2599	1.5452	1.3166	1.0664	0.5765	1.7404	1.393	1.5085	0.897	1.6406	2.4142		0.9421	0.9277	1.0947	1.599		-0.0222219	0.216583	0.763218		0.8893	0.5228	0.0112		0.0509517	0.281664	1.95078		0.5857	0.388
	033		1,2-dilinoleoyl-GPC (18:2/18:2)	36:4-GPC		0.7407	1.0022	0.7814	0.8339	0.9978	0.9181	0.9088	0.9589	0.9481	0.8618	1.0165	0.8397	1.0492	1.1397	1.3647	1.3482	1.3426	0.6271	1.4225	1.064	1.2187	0.7028	1.4716	1.3246		0.879	0.9223	1.1452	1.2007		0.0693729	0.381665	0.449941		0.4025	0.1168	0.0509		0.395234	0.932557	1.29328		0.432	0.1649
	034		1-linoleoyl-2-linolenoyl-GPC (18:2/18:3)*	36:5-GPC		0.8231	0.9091	0.8757	0.8692	1.0295	0.9156	0.7509	1.1155	0.9113	1.0538	1.0027	0.996	0.9726	1.0619	1.1524	1.1938	1.1312	0.6544	1.1977	0.9973	1.1031	0.6336	1.2853	1.1883		0.9037	0.9717	1.0277	1.0676		0.104667	0.185503	0.240455		0.3312	0.2884	0.2384		0.47991	0.540005	0.622694		0.4263	0.2868
	035		1,2-dilinolenoyl-GPC (18:3/18:3)*	36:6-GPC		0.9293	0.9855	0.9741	1.0362	1.0991	1.1707	0.697	1.3713	1.1344	1.3312	1.2581	1.2229	0.9788	0.9153	1.1041	1.0337	1.0155	0.655	0.853	0.7776	0.8577	0.5482	1.0145	0.9044		1.0325	1.1692	0.9504	0.8259		0.17938	-0.119535	-0.322103		0.3725	0.3023	0.0398		0.428874	0.519562	1.40012		0.4263	0.2933
	036		1-palmitoyl-2-linoleoyl-GPE (16:0/18:2)	34:2-GPE		0.9546	0.821	0.8906	0.7883	0.847	0.8454	0.7229	1.1064	0.9383	1.0476	0.9746	1.0254	0.8422	1.0354	1.1692	1.1423	1.201	0.7208	1.3802	1.1881	1.3058	0.778	1.4386	1.432		0.8578	0.9692	1.0185	1.2538		0.176153	0.247733	0.547594		0.1313	0.1275	0.0117		0.881735	0.89449	1.93181		0.3007	0.171
	037		1-palmitoyl-2-oleoyl-GPE (16:0/18:1)	34:1-GPE		1.1159	0.9886	1.082	0.8056	0.7441	0.8727	0.854	0.9487	1.1583	0.9849	0.9842	1.0011	0.6906	1.0783	1.4751	1.0387	0.8228	0.5519	1.831	1.4948	1.5957	0.9989	1.436	2.5602		0.9348	0.9886	0.9429	1.6528		0.0807292	0.012447	0.822183		0.4425	0.8493	0.0058		0.354087	0.0709389	2.23657		0.4389	0.5202
	038		1-stearoyl-2-linoleoyl-GPE (18:0/18:2)*	36:2-GPE		1.0074	0.7776	0.9674	0.8365	0.861	0.8546	0.6833	1.0722	0.9849	0.9664	0.9926	1.0439	0.8554	1.1508	1.2854	1.3089	1.2561	0.7386	1.5681	1.3512	1.3863	0.8408	1.5277	1.5243		0.8841	0.9572	1.0992	1.3664		0.114611	0.314172	0.628098		0.3765	0.1068	0.0056		0.424235	0.971429	2.25181		0.4263	0.157
	039		1-oleoyl-2-linoleoyl-GPE (18:1/18:2)*	36:3-GPE		1.0622	1.0248	1.0942	0.7418	0.8918	0.9856	0.8483	0.8434	1.0518	0.8402	0.996	0.9189	0.7078	1.169	1.3207	0.9954	0.8728	0.7335	1.5554	1.3989	1.3681	1.004	1.4368	2.0442		0.9668	0.9165	0.9665	1.4679		-0.0770826	-0.000447741	0.602464		0.5068	0.8814	0.0059		0.295163	0.054827	2.22915		0.4692	0.5309
	040		1,2-dilinoleoyl-GPE (18:2/18:2)*	36:4-GPE		0.8484	0.8221	1.1304	0.6794	0.8506	0.7994	0.8208	1.1534	0.823	0.9925	0.9075	1.0075	0.8265	1.2089	1.1205	1.1774	1.4436	0.717	1.3197	1.2742	1.2907	0.7462	1.6045	1.3975		0.8551	0.9508	1.0823	1.2722		0.153049	0.339935	0.57316		0.2302	0.1173	0.0155		0.637895	0.930702	1.80967		0.3886	0.1649
	041		1,2-dipalmitoyl-GPG (16:0/16:0)	32:0-GPG		1.275	0.7582	0.9534	0.8695	1.0482	1.0257	0.4737	1.3657	1.4618	1.5563	1.4026	1.155	0.7258	0.52	1.0657	0.9129	0.9743	0.2216	1.1394	0.8283	1.0513	0.2623	0.9516	1.0795		0.9883	1.2358	0.7367	0.8854		0.322424	-0.423872	-0.15862		0.4191	0.1661	0.4465		0.377682	0.77963	0.350179		0.4369	0.1992
	042		1-palmitoyl-2-oleoyl-GPG (16:0/18:1)	34:1-GPG		1.9102	1.2585	0.8232	1.0151	0.971	0.8346	0.5392	1.2017	1.7341	2.3396	1.1239	1.7274	0.4447	0.5432	0.9149	0.816	0.9858	0.395	1.4565	1.0125	1.0669	0.588	0.9875	2.4372		1.1354	1.4443	0.6832	1.2581		0.34717	-0.732821	0.148046		0.4601	0.0299	0.8274		0.337148	1.52433	0.0822845		0.4474	0.0652
	043	Lyso-phospholipids	1-palmitoyl-GPA (16:0)	16:0-LGPA		0.9861	0.7413	0.761	0.7485	1.0157	1.009	0.5884	1.0158	0.8992	1.0654	0.991	0.7947	0.9755	0.815	1.1296	1.1342	0.9846	0.3822	2.0046	3.17	2.2636	1.0117	2.249	2.4113		0.8769	0.8924	0.9035	2.185		0.0252782	0.0431123	1.31715		0.9359	0.9239	0.0015		0.0287706	0.034375	2.82391		0.5987	0.5425
	044		1-palmitoyl-GPC (16:0)	16:0-LGPC		0.8247	0.9011	1.005	0.7814	0.9239	1.1534	0.5856	1.027	0.9669	0.9601	0.995	0.8699	1.2402	0.9784	1.4209	1.1242	0.7622	0.5929	6.1832	13.5485	4.6665	3.1014	8.2566	6.6287		0.9316	0.9008	1.0198	7.0641		-0.0485038	0.130504	2.92272		0.6935	0.7049	0.0001		0.158954	0.151872	4		0.5483	0.4691
	045		1-stearoyl-GPC (18:0)	18:0-LGPC		0.8368	0.8329	1.0309	0.6821	1.1285	1.231	0.6268	0.8403	0.9691	0.7586	0.9507	0.8239	1.151	0.9575	1.3281	1.3493	0.9335	0.536	4.2745	9.0314	3.0163	1.5764	6.5711	4.8513		0.957	0.8282	1.0426	4.8868		-0.20854	0.123595	2.3523		0.258	0.7181	0.0011		0.58838	0.143815	2.95861		0.4067	0.4755
	046		1-oleoyl-GPC (18:1)	18:1-LGPC		0.8604	0.3237	1.6056	0.5438	0.3237	0.9833	0.9774	0.3237	1	0.6331	0.7529	0.5258	0.3237	0.7628	1.1659	1.0965	0.9599	1.0407	1.9902	2.1844	1.3345	1.2569	1.5925	1.801		0.7734	0.7022	0.8916	1.6932		-0.139333	0.205182	1.13047		0.99	0.4931	0.0147		0.00436481	0.307065	1.83268		0.6163	0.3773
	047		1-linoleoyl-GPC (18:2)	18:2-LGPC		1.0027	0.8354	1.3	0.7501	1.1893	0.9973	0.7863	1.2272	0.7443	0.7722	0.8639	0.7495	1.0724	0.9364	1.1662	1.1889	0.9928	0.6267	1.2886	1.4647	1.2595	0.8597	1.6492	1.2787		1.0125	0.8573	0.9972	1.3001		-0.24005	-0.0219671	0.360701		0.1813	0.887	0.071		0.741602	0.0520764	1.14874		0.3325	0.5309
	048		1-linolenoyl-GPC (18:3)*	18:3-LGPC		1.018	0.9618	0.8865	0.7303	1.2211	1.1943	0.8273	1.1433	1.1064	0.982	1.2089	0.8707	1.0328	0.8577	1.1667	1.086	0.7862	0.6126	1.0727	1.2291	0.9779	0.4627	1.1649	0.9417		1.002	1.0231	0.9236	0.9749		0.0300647	-0.117542	-0.0395564		0.8005	0.4944	0.7378		0.0966387	0.305922	0.132061		0.57	0.3773
	049		1-palmitoyl-GPE (16:0)	16:0-LGPE		0.3179	0.3179	0.3179	0.4976	0.3179	0.3179	0.3179	0.3179	0.8115	0.5754	0.3179	0.3179	0.3179	0.7416	0.9439	1	0.3179	0.3179	4.7487	8.7091	4.1913	1.9609	5.3636	5.7171		0.3479	0.4431	0.6065	5.1151		0.34896	0.801835	3.87802		0.358	0.1232	1.2186e-05		0.446117	0.909389	4.91414		0.4263	0.1679
	050		1-stearoyl-GPE (18:0)	18:0-LGPE		0.3656	0.3656	0.3656	0.3656	0.3656	1.1374	0.3656	0.3656	0.8626	0.3656	0.6881	0.3656	0.3656	0.3656	0.6182	0.7614	0.3656	0.3656	1.3025	2.1806	0.3656	0.3656	1.3045	1.6526		0.4942	0.5022	0.4737	1.1952		0.023167	-0.0611213	1.27409		0.8157	0.9311	0.066		0.0884695	0.0310037	1.18046		0.5765	0.5425
	051		1-linoleoyl-GPE (18:2)*	18:2-LGPE		0.8124	1.0349	1.6197	0.7386	0.9252	1.1751	0.6318	1.0381	0.9984	0.6881	1.0016	0.6197	0.8041	0.9225	1.1157	1.2312	0.6706	0.5588	1.789	1.8421	1.5808	0.8699	1.4506	2.0017		1.051	0.8296	0.8838	1.589		-0.341275	-0.249971	0.596356		0.1709	0.3228	0.0338		0.767258	0.491066	1.47108		0.3316	0.2994
	052		1-palmitoyl-GPG (16:0)*	16:0-LGPG		0.2438	0.2438	0.2438	0.2438	0.9383	2.0055	1.0144	0.2438	0.2438	0.2438	0.2438	0.7384	0.9614	1	0.2438	0.2438	0.2438	0.2438	0.5334	3.1853	3.7873	2.4089	2.3692	0.7432		0.6532	0.4547	0.4894	2.1712		-0.52261	-0.416511	1.7329		0.7483	0.8198	0.0203		0.125924	0.0862921	1.6925		0.5628	0.5074
	053		1-palmitoyl-GPI (16:0)	16:0-LGPI		0.2596	0.2596	0.2596	0.2596	0.663	1.7117	0.3842	0.2596	0.2596	0.2596	0.2596	0.2596	0.7596	1.072	0.2596	0.2596	0.2596	0.2596	0.7169	2.6088	2.7046	1.5653	1.8753	0.928		0.5688	0.2803	0.4783	1.7331		-1.02095	-0.250006	1.60736		0.2681	0.8974	0.0085		0.571703	0.0470139	2.07058		0.4104	0.5346
	054	Phospholipid Metabolism	glycerol 3-phosphate	G3P		1.1345	0.8472	0.8611	0.9096	0.7657	1.0482	0.6731	0.8563	0.9816	0.6923	0.8838	1.0414	0.7334	1.035	1.1022	1.0184	0.7074	1.0875	1.3765	1.6642	1.3594	0.7572	1.4795	1.992		0.9277	0.8548	0.9473	1.4381		-0.118071	0.030163	0.632434		0.3828	0.8968	0.0275		0.417028	0.0473044	1.56067		0.4263	0.5346
	055		phosphoethanolamine	PE		1.0368	0.5223	0.9579	0.8478	0.3543	0.9233	0.4451	0.9102	1.0901	0.9503	0.8774	0.6009	1.1315	1.6813	1.676	1.8347	1.0956	1.239	1.0516	1.1703	1.1152	0.8093	1.3822	0.9632		0.7737	0.8123	1.443	1.082		0.0702384	0.899225	0.483854		0.7537	0.0102	0.0806		0.122801	1.9914	1.09366		0.5629	0.0325
	056		glycerophosphoethanolamine	GPE		0.9923	0.9203	1.1938	1.137	0.9101	1.0671	0.6342	0.9119	1.0077	0.5533	0.9447	0.8886	0.6244	1.1081	1.1872	1.2042	0.5757	0.9801	1.3105	1.376	1.4272	0.9455	1.3	1.2907		1.0368	0.8234	0.9466	1.275		-0.332472	-0.131311	0.29836		0.0578	0.4018	0.0238		1.23807	0.39599	1.62342		0.2067	0.3345
	057		glycerophosphorylcholine	GPC		1.0101	0.9899	1.0843	0.9779	0.9043	1.0631	0.5676	0.8123	1.0582	0.642	0.8957	0.8432	0.585	1.0222	1.0103	0.9653	0.5582	0.841	1.687	1.2231	1.8478	1.2626	1.6449	1.7026		1.0049	0.8032	0.8303	1.5613		-0.323221	-0.275347	0.635696		0.0465	0.1107	0.001		1.33255	0.955852	3		0.1965	0.1599
	058		glycerophosphoinositol*	GPI		0.7284	0.5984	0.9919	0.935	0.4507	1.1748	0.4538	0.8285	0.8071	1.0109	0.7674	1.3285	0.6743	0.8918	1.6387	1.0081	0.4616	1.0993	3.0297	2.3301	2.9756	1.9185	1.6194	2.5258		0.8132	0.866	0.9623	2.3998		0.0907568	0.242877	1.56123		0.7646	0.5476	0.0002		0.116566	0.261537	3.69897		0.5659	0.4023
	059		glycerophosphoglycerol	GPG		0.9701	0.9135	0.8713	0.9355	0.721	1.163	1.2259	0.9083	0.9091	0.9113	0.8953	1.1317	0.7466	1.0053	1.1904	1.149	0.7777	0.9947	2.3662	1.5698	2.3614	1.7282	1.2708	2.3952		0.9291	0.9969	0.9773	1.9486		0.101615	0.0729676	1.06853		0.4141	0.667	0.0004		0.382895	0.175874	3.39794		0.4364	0.4555
	060		glycerophosphoserine*	GPS		1.1287	0.7443	1.0147	0.9571	0.53	1.0353	0.6664	0.9603	1.23	0.7568	0.7454	0.9853	0.4829	0.9554	1.491	1.0641	0.3526	1.1481	1.7632	1.9959	1.6873	0.9115	1.6348	2.2358		0.9017	0.8907	0.9157	1.7048		-0.0177079	0.0222275	0.918883		0.98	0.7951	0.0044		0.00877392	0.0995782	2.35655		0.6136	0.4999
	061	Choline metabolism	choline	CHO		0.9475	1.0794	1.1596	0.8319	0.9828	1.0451	1.3181	0.8688	0.8594	0.7136	1.1078	0.9911	1.4231	1.306	1.2024	1.0197	1.1833	1.1924	0.917	0.8649	0.822	0.5985	1.0089	0.8818		1.0077	0.9765	1.2211	0.8489		-0.0453743	0.277115	-0.2474		0.6609	0.0149	0.0717		0.179864	1.82681	1.14448		0.5369	0.041
	062		choline phosphate	CHO-P		1.0991	0.8549	1.0372	1.095	0.61	0.9036	0.6468	0.8317	1.1549	0.9628	0.8221	0.8644	0.6927	1.0556	1.1696	1.0941	0.7846	0.8404	1.329	1.1955	1.2924	0.9254	1.5611	2.0216		0.9333	0.8805	0.9395	1.3875		-0.0840179	0.00955227	0.572075		0.6626	0.9505	0.0209		0.178749	0.0220479	1.67985		0.5369	0.544
	063		betaine	BET		0.9756	1.1992	1.4404	0.9191	1.14	1.5232	0.7759	0.5424	1.0831	0.6121	0.9325	0.7909	0.7683	1.4522	1.1395	0.8717	0.4245	0.6389	1.2894	1.0391	1.2819	0.7358	1.0244	1.2337		1.1996	0.7895	0.8825	1.1007		-0.603542	-0.442885	-0.124132		0.01	0.1031	0.4874		2	0.986741	0.312114		0.0943	0.1523
	064		2-dimethylaminoethanol	dmAEtOH		1.1682	1.6866	1.2217	0.947	2.9757	1.2012	2.4915	1.0999	0.9602	0.5573	1.2527	1.1677	0.9129	1.5223	0.9615	0.9858	1.0142	1.3576	0.5321	0.5511	0.5274	0.3729	0.7809	0.5571		1.5334	1.2549	1.1257	0.5536		-0.289162	-0.445912	-1.46982		0.4089	0.2202	0.001		0.388383	0.657183	3		0.4341	0.2399
	065	Glycerolipids - Monoacyl	glycerol	GLY		0.9924	1.3421	0.8487	0.623	1.0076	1.1968	0.5657	0.7888	0.7233	0.8983	0.9887	0.8423	1.1427	1.0467	1.094	0.8847	0.9414	0.8288	3.5369	20.6958	6.9217	10.0941	9.2154	15.0708		1.0018	0.8012	0.9897	10.9225		-0.32236	-0.0175313	3.44664		0.1575	0.9352	8.2772e-05		0.802719	0.0290955	4.08212		0.3207	0.5435
	066		1-palmitoylglycerol (16:0)	16:0-MAG		0.429	0.429	0.429	0.429	0.429	1	0.429	0.429	0.429	0.429	0.429	0.429	1.0343	0.6842	0.429	0.429	0.429	0.429	0.429	0.429	0.429	5.0842	0.429	0.429		0.5241	0.429	0.5724	1.2048		-0.288864	0.127182	1.20088		0.3632	0.6956	0.5561		0.439854	0.15764	0.254847		0.4263	0.4674
	067		1-linoleoylglycerol (18:2)	18:2-MAG(1)		0.5412	0.5412	0.5412	0.5412	1.1629	1.4701	0.5419	0.5412	0.5412	0.5412	0.5412	0.5412	1.3484	1	0.5412	0.5412	0.5412	0.5412	0.5412	0.5412	0.5412	0.614	0.5412	0.5412		0.7996	0.5413	0.7522	0.5533		-0.56285	-0.0881622	-0.531217		0.1796	0.8779	0.2081		0.745694	0.056555	0.681728		0.3316	0.5309
	068		1-linolenoylglycerol (18:3)	18:3-MAG		0.1514	0.1795	0.2003	0.2898	3.3329	6.0595	1.6948	0.1924	0.1514	0.2924	1.208	1.38	4.8457	3.3183	1.0794	0.6412	0.237	0.5374	0.1514	0.3397	1.1541	1.4599	1	0.1514		1.7022	0.8198	1.7765	0.7094		-1.05406	0.0616371	-1.26273		0.9547	0.4576	0.8557		0.0201331	0.339514	0.0676785		0.6073	0.3649
	069		2-linoleoylglycerol (18:2)	18:2-MAG(2)		0.8102	0.8102	0.8102	0.8102	0.8102	1.3071	0.8102	0.8102	0.8102	0.8102	0.8102	0.8102	1.1285	0.8715	0.8102	0.8102	0.8102	0.8102	0.8102	0.8102	0.8102	0.8102	0.8102	0.8102		0.893	0.8102	0.8735	0.8102		-0.140382	-0.0318525	-0.140382		0.3632	0.901	0.3632		0.439854	0.0452752	0.439854		0.4263	0.5356
	070	Glycerolipids - Diacyl	palmitoyl-linolenoyl-glycerol (16:0/18:3) [2]*	34:3-DAG		1.231	1.197	0.7572	1.0528	0.9895	0.8814	1.1099	1.421	1.8885	1.4591	0.9785	1.2447	0.6418	0.7525	0.7958	1.0105	0.8486	0.4668	1.1267	0.7641	1.2945	0.5537	0.8564	1.4423		1.0182	1.3503	0.7527	1.0063		0.407259	-0.435874	-0.0169605		0.0482	0.0408	0.7737		1.31695	1.38934	0.111427		0.1965	0.0808
	071		linoleoyl-linolenoyl-glycerol (18:2/18:3) [2]*	36:5-DAG		0.9512	0.9381	0.8932	0.8854	0.8161	0.8953	0.9672	1.1443	1.239	1.1489	1.0834	1.1792	0.8426	1.0024	1.0211	1.1577	0.9976	0.712	1.5272	0.98	1.6246	0.723	1.2715	1.1728		0.8966	1.127	0.9556	1.2165		0.329951	0.0919424	0.4402		0.0005	0.4963	0.0777		3.30103	0.304256	1.10958		0.046	0.3773
	072		linolenoyl-linolenoyl-glycerol (18:3/18:3) [2]*	36:6-DAG		1.0743	1.0324	1.035	0.9646	0.9921	1.0891	1.0247	1.2294	1.5201	1.2911	1.3069	1.2348	0.8074	0.8053	0.8706	1.0079	0.8345	0.7024	0.9687	0.8156	1.2537	0.6923	0.9622	0.9115		1.0313	1.2678	0.838	0.934		0.297863	-0.299442	-0.14297		0.01	0.0053	0.2202		2	2.27572	0.657183		0.0943	0.022
	073	Galactolipids	1-palmitoyl-2-linoleoyl-galactosylglycerol (16:0/18:2)*	34:2-MGDG		1.3964	1.3157	1.0142	1.0694	1.0051	0.7807	1.4364	1.0278	1.483	1.5493	0.9935	1.2245	0.5308	0.9451	1.1852	0.9949	0.9757	0.6508	0.8887	0.7316	0.7733	0.5385	0.9726	1.1708		1.0969	1.2858	0.8804	0.8459		0.229234	-0.317201	-0.374873		0.1941	0.1487	0.0808		0.711974	0.827689	1.09259		0.3494	0.1876
	074		1-palmitoyl-2-linolenoyl-galactosylglycerol (16:0/18:3)*	34:3-MGDG		1.0476	1.087	0.9767	0.9661	1.1678	1.0091	1.0241	1.3163	1.242	1.4342	1.1972	1.2877	0.9401	0.9452	1.0041	0.9959	1.3063	0.6283	0.7373	0.7114	0.7575	0.5303	0.9776	0.8366		1.0424	1.2502	0.97	0.7584		0.26225	-0.103852	-0.458878		0.0105	0.3964	0.0085		1.97881	0.401866	2.07058		0.0943	0.3322
	075		1,2-dilinoleoyl-galactosylglycerol (18:2/18:2)*	34:4-MGDG		1.0755	1.2206	1.018	0.9365	0.9381	0.9313	1.1721	0.9502	1.2853	1.2273	0.9808	1.0796	0.717	1.0762	1.211	0.9796	1.0029	0.649	0.9971	0.835	0.9211	0.6005	1.0262	1.2003		1.02	1.1159	0.9393	0.93		0.129639	-0.118911	-0.133267		0.2123	0.3824	0.3367		0.67305	0.417482	0.472757		0.3734	0.3245
	076		1-linoleoyl-2-linolenoyl-galactosylglycerol (18:2/18:3)*	36:5-MGDG		1.0325	1.3855	1.1214	1.271	1.1692	1.1384	1.0972	1.0005	1.4936	1.3699	1.1207	1.2828	0.6913	0.9442	0.9995	0.8749	0.8604	0.6204	0.9301	0.8227	0.8813	0.6274	0.8519	0.8895		1.1863	1.2275	0.8318	0.8338		0.0492541	-0.51216	-0.508696		0.7074	0.0032	0.0007		0.150335	2.49485	3.1549		0.5483	0.0171
	077		1-linolenoyl-2-hexadecatrienoyl-galactosylglycerol (18:3/16:3)	34:6-MGDG		0.6608	1.4207	1.0045	0.8475	1.4303	1.3726	1.0882	1.7351	1.3761	1.4967	1.3628	1.2806	1.0845	0.8593	0.9198	0.9955	1.2812	0.5109	0.8534	0.6781	0.9378	0.529	0.9374	0.589		1.1227	1.3899	0.9419	0.7541		0.308009	-0.253327	-0.574145		0.1368	0.37	0.0452		0.863914	0.431798	1.34486		0.3007	0.3212
	078		1,2-dilinolenoyl-galactosylglycerol (18:3/18:3)*	36:6-MGDG		0.8416	1.0734	1.0627	0.9871	1.1318	1.0669	1.0829	1.2632	1.0778	1.1759	1.0313	1.1447	0.9351	1.0129	0.894	0.9671	1.0976	0.7259	0.7973	0.8733	0.8579	0.7566	0.9748	0.8491		1.0272	1.1293	0.9388	0.8515		0.136712	-0.129827	-0.270639		0.0965	0.2233	0.0076		1.01547	0.651111	2.11919		0.2591	0.2413
	079		1-palmitoyl-2-linoleoyl-digalactosylglycerol (16:0/18:2)*	34:2-DGDG		1.2548	1.1329	1.0606	0.9787	0.9651	0.7958	1.3483	0.915	1.4171	1.4199	1.0104	1.1965	0.5397	1.0143	1.0395	0.9166	0.9896	0.6149	0.8496	0.8312	0.7852	0.5429	1.1326	1.0886		1.0313	1.2179	0.8524	0.8717		0.239932	-0.274862	-0.24256		0.1333	0.1499	0.1764		0.87517	0.824198	0.753501		0.3007	0.1876
	080		1-palmitoyl-2-linolenoyl-digalactosylglycerol (16:0/18:3)	34:3-DGDG		0.9488	1.0568	1.0071	0.9278	1.1124	0.9929	1.0599	1.3011	1.1808	1.2862	1.155	1.2385	0.9687	1.0247	0.9679	1.027	1.1617	0.7007	0.7442	0.7832	0.8354	0.6255	0.9925	0.8128		1.0076	1.2036	0.9751	0.7989		0.256433	-0.0473009	-0.334836		0.0018	0.5904	0.0096		2.74473	0.228854	2.01773		0.0549	0.4266
	081		1,2-dilinoleoyl-digalactosylglycerol (18:2/18:2)*	36:4-DGDG		0.9607	1.065	0.999	0.9166	0.9609	0.9137	1.0929	1.0099	1.1017	1.1564	1.0009	1.068	0.8252	1.0067	1.118	0.9991	1.0581	0.6895	0.9271	0.8748	0.9556	0.676	1.1329	1.0178		0.9693	1.0716	0.9494	0.9307		0.144751	-0.0299272	-0.058627		0.0114	0.6912	0.5182		1.9431	0.160396	0.285503		0.0943	0.4671
	082		1-linoleoyl-2-linolenoyl-digalactosylglycerol (18:2/18:3)*	36:5-DGDG		1.0404	1.1882	1.1579	1.1333	1.0636	1.01	1.1888	1.0391	1.3296	1.2494	0.9799	1.1657	0.6147	0.99	1.0412	0.8749	0.8157	0.5813	0.8218	0.8323	0.8144	0.6722	0.886	0.9488		1.0989	1.1587	0.8196	0.8293		0.076447	-0.423068	-0.406094		0.3835	0.0233	0.0008		0.416235	1.63264	3.09691		0.4263	0.0559
	083		1,2-dilinolenoyl-digalactosylglycerol (18:3/18:3)	36:6-DGDG		0.8546	1.0241	1.1415	0.9759	1.0618	1.0335	1.156	1.2763	1.0811	1.1671	1.0781	1.1531	0.9173	1.0334	0.9129	0.9341	1.072	0.7505	0.7515	0.8375	0.9095	0.7152	0.96	0.7757		1.0152	1.1519	0.9367	0.8249		0.182252	-0.116105	-0.299473		0.0244	0.2297	0.0069		1.61261	0.638839	2.16115		0.1537	0.2462
	084		monogalactosylglycerol	MGDG		0.6633	1.0674	0.9326	0.7375	0.9277	0.9312	1.4359	0.7036	0.7118	0.714	0.824	0.8059	1.6376	1.5457	1.3361	1.3386	1.6625	1.2487	1.1286	1.334	0.8376	1.1324	1.4369	0.9129		0.8766	0.8658	1.4615	1.1304		-0.0178849	0.737459	0.366843		0.7985	0.0002	0.0508		0.0977251	3.69897	1.29414		0.57	0.0033
	085		digalactosylglycerol*	DGDG		1.0449	1.1221	0.9957	1.1306	1.1934	1.0982	1.5027	1.3056	1.3161	1.3121	1.1103	1.2704	1.0043	0.8514	0.8691	0.9651	0.9471	0.913	0.702	0.682	0.8153	0.7867	0.733	0.6552		1.0975	1.3029	0.925	0.729		0.247505	-0.246696	-0.59023		0.0063	0.0009	4.2645e-06		2.20066	3.04576	5.37013		0.091	0.0086
	086	Lyso-galactolipids	1-linolenoyl-galactosylglycerol (18:3)*	18:3-LMGDG(1)		0.9174	1.6505	1.0307	0.837	1.4603	2.0398	1.3633	1.4557	1.1945	0.8892	1.4017	1.1223	1.1086	0.8583	1.0416	0.9693	1.3553	0.7822	0.5497	0.4637	0.3275	0.2871	0.6042	0.3364		1.3226	1.2378	1.0192	0.4281		-0.0955986	-0.37594	-1.62736		0.8751	0.2159	0.0002		0.0579423	0.665747	3.69897		0.5825	0.2368
	087		1-palmitoyl-digalactosylglycerol (16:0)*	16:0-LDGDG(1)		0.1688	0.1688	0.1688	0.1688	0.8474	1.1949	1.8149	0.1688	0.1688	0.1688	0.1688	0.5016	1.2814	1.4799	0.3782	0.1688	0.1688	0.1688	0.1688	0.552	1.1526	1.3365	0.6574	0.1688		0.453	0.4986	0.6077	0.6727		0.138372	0.423848	0.570452		0.975	0.6818	0.373		0.0109954	0.166343	0.428291		0.6136	0.462
	088		1-linolenoyl-digalactosylglycerol (18:3)*	18:3-LDGDG(1)		1.1723	1.2676	0.7907	0.4718	1.2491	1.4108	1.3328	0.9865	0.8674	0.7711	1.4541	1.1094	1.2248	1.0491	1.2138	1.0135	1.489	0.8492	0.694	0.4416	0.6091	0.4525	0.8608	0.4811		1.0604	1.0869	1.1399	0.5899		0.0356106	0.104299	-0.846066		0.7608	0.5447	0.0239		0.118729	0.263843	1.6216		0.5659	0.4013
	089		2-linolenoyl-galactosylglycerol (18:3)*	18:3-LMGDG(2)		0.9408	1.435	0.9533	0.7105	1.5419	1.8079	0.8591	1.1553	0.9303	1.2297	1.5677	1.202	1.7385	1.1003	1.1459	1.0467	1.3755	0.9117	0.4421	0.3494	0.3306	0.3806	0.6645	0.3417		1.2316	1.1574	1.2198	0.4181		-0.0896462	-0.0138892	-1.55861		0.8686	0.9102	0.0002		0.0611802	0.0408632	3.69897		0.5825	0.5386
	090		2-palmitoyl-digalactosylglycerol (16:0)*	16:0-LDGDG(2)		0.2459	0.2459	0.2459	0.2459	1.161	2.3501	1.7578	0.2459	0.2459	0.2459	0.2459	0.839	2.7437	1.7086	0.2459	0.2459	0.2459	0.2459	0.2459	0.2459	0.6107	0.7662	0.6992	0.2459		0.7491	0.5968	0.906	0.469		-0.327911	0.274353	-0.67557		0.8534	0.8871	0.8065		0.0688474	0.0520274	0.0933956		0.5825	0.5309
	091		2-linolenoyl-digalactosylglycerol (18:3)*	18:3-LDGDG(2)		1.0543	1.3374	0.6626	0.452	1.7454	2.3356	0.7568	0.8991	0.7449	1.2781	1.9337	1.4024	2.303	1.2163	1.3899	0.9457	1.6932	1.0938	0.4332	0.3083	0.3363	0.3703	0.711	0.4274		1.2645	1.1692	1.4403	0.4311		-0.113045	0.187802	-1.55247		0.9911	0.4406	0.0094		0.00388252	0.355956	2.02687		0.6163	0.3568
	092	Sphingolipids	sphinganine	LCB-spha		0.8708	0.8863	1.053	0.9745	1.0255	0.9682	1.0308	1.1407	1.1209	0.8734	1.1299	1.0854	0.5146	0.9244	1.9568	1.073	0.7821	0.695	1.0424	0.8438	1.1361	0.9249	0.9659	1.2676		0.963	1.0635	0.991	1.0301		0.143212	0.0413493	0.0971767		0.0914	0.7556	0.3969		1.03905	0.121708	0.401319		0.2524	0.4866
	093		3-ketosphinganine	LCB-kspha		0.6958	1.0916	1.147	0.7028	0.9826	1.1386	0.7727	0.8247	0.7679	0.5227	0.9381	0.5703	0.5895	1.2588	1.6038	1.3411	0.8017	0.7178	1.3986	1.3703	1.3461	1.0174	2.0445	1.6068		0.9597	0.7327	1.0521	1.4639		-0.389361	0.132616	0.609162		0.0711	0.8026	0.0103		1.14813	0.0955008	1.98716		0.2193	0.5018
	094		phytosphingosine	LCB-pspho		0.8616	1.056	1.0437	1.0928	1.0831	0.9697	1.1927	1.1668	1.2216	1.1749	0.9741	0.9803	0.6081	1.138	1.2928	1.0838	0.8712	0.7803	1.0197	0.5978	0.9534	0.7537	0.8231	0.9672		1.0178	1.1184	0.9624	0.8525		0.135982	-0.0807455	-0.255682		0.1262	0.5096	0.0727		0.898941	0.292771	1.13847		0.3007	0.383
	095		dehydrophytosphingosine*	LCB-dspho		0.8438	0.9374	1.1286	1.1318	0.9962	1.1426	1.0289	1.0042	1.1002	1.0375	1.0038	0.8348	0.73	1.1705	1.4941	1.4045	0.8505	0.9222	1.1889	0.6195	0.9495	0.7076	0.7636	0.9753		1.0301	1.0016	1.0953	0.8674		-0.0404779	0.0885417	-0.248015		0.7001	0.8013	0.1269		0.15484	0.0962049	0.896538		0.5483	0.5018
	096		sphingosine	LCB-spho		0.7123	1.0641	0.8619	0.9689	1.0012	0.9794	1.0173	1.0753	1.249	1.2242	1.0189	0.9988	0.3613	1.047	1.0717	1.0493	0.7275	0.7263	1.006	0.4226	1.0935	0.5865	0.8431	0.8604		0.9313	1.0972	0.8305	0.802		0.236509	-0.165266	-0.215644		0.0439	0.3846	0.2705		1.35754	0.414991	0.567833		0.1947	0.3245
	097		sphingadienine	LCB-espha		0.7477	0.8938	1.0954	1.1593	0.9968	1.0501	1.0032	0.9082	1.0791	1.0575	0.9161	0.8307	0.6347	1.2097	1.6673	1.4084	0.9677	0.9663	1.2934	0.8202	1.0503	0.6513	0.8506	1.1627		0.9905	0.9658	1.1424	0.9714		-0.0364325	0.205839	-0.0280915		0.8084	0.5084	0.7785		0.0923737	0.293794	0.108741		0.5728	0.383
	098	Sterols	campesterol	CampeS		1.1917	0.8213	0.9541	1.1433	1.1191	0.9592	0.9192	1.0546	1.0422	1.3621	0.9296	1.2657	0.5855	0.8339	1.0083	1.0273	0.7393	0.454	1.149	1.1884	0.6171	0.4068	0.9917	1.4793		1.0315	1.0956	0.7747	0.9721		0.0869773	-0.413034	-0.0855672		0.526	0.0616	0.5295		0.279014	1.21042	0.276134		0.4793	0.1096
	099		beta-sitosterol	βSitoS		1.1517	1.0375	0.9945	1.0704	0.9304	0.8326	0.7886	1.0372	1.1892	1.2957	0.9463	1.1522	0.6827	0.7887	0.9591	1.0611	0.9156	0.7132	1.0055	0.9177	1.0891	0.5685	1.1186	1.2865		1.0028	1.0682	0.8534	0.9977		0.0911479	-0.23274	-0.00735592		0.54	0.0806	0.8165		0.267606	1.09366	0.0880438		0.4875	0.1334
	100		stigmasterol	StigmaS		1.2055	0.9507	0.9336	0.8852	0.8244	1.1566	0.6638	1.0929	1.101	1.111	0.9638	0.7865	0.9157	1.1119	1.2293	1.2699	0.9694	0.5772	1.3552	1.2893	0.9899	0.4476	1.0101	1.298		0.9927	0.9532	1.0122	1.065		-0.0585788	0.0280647	0.101424		0.6571	0.9851	0.9177		0.182369	0.00651968	0.0372993		0.5369	0.5531
	101	Sulfolipids	SQDG (18:3/16:0)	34:3-SQDG		1.0209	1.0655	0.9088	0.8321	1.028	1.1163	0.7876	0.9898	1.0484	1.0974	1.0386	1.057	1.0486	1.0102	0.9567	1.0319	1.2174	0.5975	0.6004	0.6059	0.5894	0.4102	0.8873	0.78		0.9953	1.0032	0.977	0.6455		0.0114059	-0.0267729	-0.624714		0.9175	0.7511	0.0067		0.0373939	0.124302	2.17393		0.5973	0.4851
	102		1-palmitoyl-sulfoquinovopyranosyl-glycerol (16:0)*	16:3-SQMG		0.2849	0.2849	0.2849	0.2849	0.6126	0.9749	1.0251	0.2849	0.2849	0.2849	0.2849	0.2849	0.2849	0.644	0.2849	0.2849	0.2849	0.2849	0.2849	2.543	2.9087	2.2675	2.4331	0.6191		0.4545	0.4083	0.3447	1.8427		-0.154651	-0.398939	2.01947		0.7046	0.466	0.0243		0.152057	0.331614	1.61439		0.5483	0.366
	103		1-linolenoyl-sulfoquinovopyranosyl-glycerol (18:3)*	18:3-SQMG		1.1473	1.3546	1.0998	0.9223	1.382	1.8254	1.6699	1.1438	1.0689	0.9089	1.1205	1.0066	1.1217	1.3263	0.9235	0.9934	0.9516	0.6591	0.7872	0.9227	0.7735	0.4463	0.9804	0.706		1.2886	1.1531	0.9959	0.7694		-0.160287	-0.371732	-0.743999		0.4234	0.0873	0.006		0.373249	1.05899	2.22185		0.437	0.138
	104	Carnitine metabolism, oxidative phosphorylation	methylphosphate	mP		0.9979	0.9252	0.9755	0.8777	0.9927	1.1432	0.794	0.9666	0.7837	0.6639	1.022	1.0021	1.435	1.4091	1.2131	1.0822	1.2197	1.0541	1.0309	1.0653	0.9332	0.604	1.1857	0.9187		0.9854	0.8721	1.2355	0.9563		-0.176216	0.326314	-0.0432462		0.1398	0.007	0.6571		0.854493	2.1549	0.182369		0.3023	0.0247
	105		phosphate	P		1.1883	0.8237	0.8888	0.9945	0.944	1.0003	0.7324	0.9997	1.0323	0.6859	0.8944	1.0609	0.7458	1.0154	1.0623	0.9792	0.7884	1.0536	1.3484	3.1425	1.0201	0.5858	1.3741	2.8035		0.9733	0.9009	0.9408	1.7124		-0.111518	-0.0489965	0.815063		0.3792	0.6585	0.1717		0.421132	0.181444	0.76523		0.4263	0.4509
	106		carnitine	CAN		0.8424	0.7481	0.8647	1.1314	1.1409	0.8341	0.851	1.5067	1.3919	0.92	1.0225	1.0981	0.4933	0.9775	0.7744	0.8747	0.7036	0.9761	1.4837	1.7144	1.68	1.1843	1.1804	1.6618		0.9269	1.1317	0.7999	1.4841		0.288006	-0.212594	0.679103		0.1357	0.2414	0.0009		0.86742	0.617263	3.04576		0.3007	0.2535
	107		deoxycarnitine	dCAN		0.8824	0.796	0.9373	1.5282	1.3863	1.0621	1.9706	2.3092	1.5506	1.5803	1.3821	2.1037	0.3052	1.2232	0.683	0.9122	0.6689	1.2969	0.689	1.6452	0.7282	0.5051	0.3466	0.9379		1.0987	1.8161	0.8482	0.8086		0.725046	-0.373321	-0.442299		0.0037	0.2088	0.1415		2.4318	0.68027	0.849244		0.0709	0.2305
	108		acetylcarnitine	aCAN		0.8931	1.179	1.033	0.8684	0.967	1.0773	0.6155	0.3874	0.6344	0.5391	0.8515	0.6217	0.7716	1.3133	1.2144	1.1021	0.6907	0.7842	1.6735	1.5065	2.1299	1.3918	1.8986	1.7005		1.003	0.6083	0.9794	1.7168		-0.721467	-0.0343515	0.7754		0.0027	0.6987	6.8453e-05		2.56864	0.155709	4.16461		0.0655	0.4674
	109	Tocopherol metabolism	alpha-tocopherol	α-TP		0.9107	1.1105	0.4	1.2737	1.1125	1.0678	0.8631	0.6536	1.2704	0.3296	1.1859	0.6279	1.0613	0.8638	1.2293	1.2183	0.9202	0.955	1.476	0.6084	1.045	0.8351	0.8616	1.1458		0.9792	0.8218	1.0413	0.9953		-0.252816	0.0887103	0.0235279		0.4537	0.5582	0.8582		0.343231	0.25321	0.0664115		0.4442	0.4078
	110		alpha-tocotrienol	α-TT		1.1522	1.8285	0.2974	2.4395	1.7586	1.7558	0.7418	0.2697	2.5203	0.2904	2.1599	0.3698	2.0804	0.8221	2.8926	2.3302	0.8478	2.3166	2.9809	0.4074	0.7277	0.6785	0.5113	0.6324		1.5387	1.0587	1.8816	0.9897		-0.539418	0.290248	-0.636649		0.2591	0.5125	0.2364		0.586533	0.290306	0.626353		0.4067	0.3841
	111		gamma-tocopherol/beta-tocopherol	γ,β-TP		1.1281	1.1111	0.1974	1.3645	1.0036	1.0236	0.9098	0.4629	1.3325	0.1485	1.0626	0.4035	0.9316	0.7274	1.2042	1.2004	0.8078	0.9964	2.1938	0.4645	1.387	0.8892	0.9133	1.7048		0.9714	0.72	0.978	1.2588		-0.432069	0.00976898	0.373912		0.412	0.6692	0.4552		0.385103	0.174444	0.341798		0.4358	0.4558
	112	Prenol lipids (chlorophyll and carotenoids)	pheophorbide A	PhBA		1.2724	1.1641	1.0921	0.9909	1.3438	1.1719	1.0091	1.2556	1.0757	1.2656	1.0901	1.1835	0.7717	0.8217	0.8298	0.8654	1.0426	0.7466	0.6885	0.7419	0.6611	0.558	0.9657	0.6983		1.1725	1.1466	0.8463	0.7189		-0.0322257	-0.470347	-0.705725		0.724	0.0005	0.0004		0.140261	3.30103	3.39794		0.5551	0.0056
	113		pheophytin A	PhPA		1.3834	1.0935	0.9807	1.0106	1.2141	1.2383	0.9385	1.3047	0.9585	1.4789	1.1162	1.3849	1.1721	0.9894	0.9686	1.0185	1.2282	0.7215	0.6467	0.6578	0.6579	0.4223	0.9191	0.7506		1.1534	1.197	1.0164	0.6757		0.0535302	-0.182425	-0.771438		0.7676	0.1884	0.0018		0.114865	0.724919	2.74473		0.5659	0.2178
	114		3-hydroxy-3-methylglutarate	hmGlA		0.8127	1.0386	0.9689	1.0378	1.1586	1.2724	0.7027	1.1608	0.949	1.2723	0.9358	1.0583	1.0636	1.0438	0.9679	0.8496	0.9107	0.7585	1.0531	1.0311	1.1758	0.9613	0.8499	0.4024		1.0482	1.0132	0.9324	0.9123		-0.048995	-0.168893	-0.200334		0.7026	0.1942	0.3254		0.153292	0.711751	0.487582		0.5483	0.2209
	115		carotene diol (1)	CAR(1)		1.195	1.1877	0.8486	1.2026	1.2128	1.2165	0.8789	1.0501	1.2113	1.0524	1.1466	0.9409	1.0188	0.9191	1.1518	1.1601	0.9812	0.9788	0.9378	0.6552	0.776	0.6868	0.82	0.8299		1.1439	1.0467	1.035	0.7843		-0.128113	-0.14433	-0.544483		0.2806	0.2042	0.0008		0.551912	0.689944	3.09691		0.4123	0.2273
	116		carotene diol (2)	CAR(2)		1.4276	1.5077	0.6797	1.4836	1.5812	1.3294	0.9986	0.8783	1.5439	0.9347	1.4925	0.8895	1.1837	0.9566	1.3487	1.2857	0.9497	1.0804	1.0014	0.5209	0.6565	0.5231	0.6905	0.6873		1.3349	1.1229	1.1341	0.68		-0.249502	-0.235184	-0.973125		0.3458	0.3734	0.0026		0.461175	0.427826	2.58503		0.4263	0.3212
	117		beta-cryptoxanthin	XAN		0.5514	0.5075	1.5698	0.2963	0.3307	0.2323	0.6394	1.7597	0.5102	1.9062	0.3727	2.2411	0.2323	1.0397	0.285	0.4581	1.2325	0.2323	1.0761	2.4936	2.8309	0.9603	1.9153	2.6846		0.5813	1.2382	0.58	1.9935		1.09089	-0.00323001	1.77795		0.105	0.968	0.0029		0.978811	0.0141246	2.5376		0.2708	0.5502
	118		oleanolate	OLN		0.1829	0.0668	0.2638	0.5346	2.7401	7.6126	1.7526	0.0668	0.1412	0.0838	1	1.3967	4.3297	5.2915	2.377	0.7826	0.3901	0.6984	0.9335	1.7463	4.542	2.9417	2.1877	0.6057		1.9001	0.7402	2.3115	2.1595		-1.36009	0.282754	0.184622		0.6184	0.2865	0.1997		0.208731	0.542875	0.699622		0.5257	0.286
	119	Jasmonic/Salicylic/Abscisic acid metabolism	abscisate	ABA		0.97	0.7119	0.8005	0.6322	0.6804	0.5591	0.7875	0.6533	0.8509	1.1023	0.7741	0.8075	0.7521	1.03	1.2739	1.6027	1.2114	1.574	1.9422	2.1484	1.4133	1.0677	2.3688	2.5735		0.7257	0.8293	1.2407	1.919		0.192521	0.773709	1.40291		0.2222	0.005	0.0004		0.653256	2.30103	3.39794		0.3856	0.022
	120		salicylate	SA		0.5348	0.8077	0.5557	0.5155	0.6087	0.8743	0.3582	0.4997	0.6581	0.727	0.6899	0.5027	1.3563	1.4305	1.5094	1.1257	1.6672	1.1772	3.0003	3.0622	2.0185	1.9311	2.3032	3.1577		0.6495	0.5726	1.3777	2.5788		-0.181802	1.08486	1.9893		0.3763	8.0149e-05	8.5898e-07		0.424466	4.0961	6.06602		0.4263	0.0014
	121		salicylate-glucoside	SA-glc		0.4712	0.5106	0.4473	0.3786	0.4053	0.5066	0.3729	0.4493	0.7235	0.7392	0.5042	0.3709	1.2608	1.3086	1.2849	1.4181	1.7768	1.3743	2.6187	2.2593	1.6321	1.4357	2.2573	2.8779		0.4533	0.5267	1.4039	2.1801		0.216515	1.6309	2.26586		0.4223	2.1559e-08	4.5931e-06		0.374379	7.66637	5.33789		0.437	2.8194e-06
	122		jasmonate	JA		0.5421	1.4355	1.0965	0.8788	0.7983	0.6432	1.662	1.3001	0.9432	2.1444	1.789	2.173	2.1289	2.4975	1.7962	2.1391	3	2.6611	3.0057	1.7382	3.2165	1.884	4.519	3.6401		0.8991	1.6686	2.3705	3.0006		0.892085	1.39864	1.7387		0.0087996	5.71e-05	0.0036051		2.05554	4.24336	2.44308		0.0087996	5.71e-05
	181	Unknown lipids Group I	X - 23897	X-23897		0.7941	1.1193	1.1318	0.9611	0.7458	0.9968	0.7921	0.9603	0.874	0.9182	0.7755	0.6693	1.519	1.1264	1.2041	1.4856	1.5364	0.7624	1.2466	1.5104	0.8093	1.0611	1.2219	1.0032		0.9582	0.8316	1.2723	1.1421		-0.204437	0.40904	0.25329		0.1583	0.0735	0.1652		0.800519	1.13371	0.78199		0.3207	0.1232
	196		X - 24686	X-24686		0.9037	1.0977	0.899	0.7896	0.9056	0.9384	1.0015	0.956	0.882	0.6552	0.897	0.9557	0.9995	1.2123	1.0005	1.036	1.2695	1.0842	2.0257	1.5713	1.2201	0.7873	1.2185	1.6701		0.9223	0.8913	1.1003	1.4155		-0.049325	0.254589	0.618004		0.6234	0.0146	0.0328		0.205233	1.83565	1.48413		0.5283	0.0407
	202		X - 25260	X-25260		0.6056	0.5956	0.6889	0.7016	0.5706	0.7058	0.6223	0.686	0.6138	0.7065	0.4993	0.5456	1.5089	1.5474	1.7494	1.8702	1.8259	1.952	1.7062	1.6548	1.2935	1.5352	1.8546	1.6308		0.6447	0.6123	1.7423	1.6125		-0.0743893	1.43429	1.3226		0.4293	1.0333e-08	9.2462e-08		0.367239	7.98577	7.03404		0.4376	2.7026e-06
	206		X - 25880	X-25880		0.8474	0.9284	0.9731	0.9555	0.9984	1.0016	1.011	0.9597	0.9007	0.4975	0.8933	0.9946	1.1001	1.5452	1.172	1.1526	1.1718	1.0239	1.0818	0.8083	1.1329	0.6901	1.6275	1.0845		0.9507	0.8761	1.1943	1.0709		-0.117895	0.329103	0.171762		0.3847	0.0099	0.529		0.414878	2.00436	0.276544		0.4263	0.0324
	191		X - 24425	X-24425		0.9877	1.0415	0.8136	1.1327	0.9732	0.9835	1.0487	0.6675	0.9272	0.7863	0.7169	1.0123	0.7469	1.0849	0.7783	0.677	0.6842	1.2152	6.8222	3.2645	4.439	2.8825	4.1121	4.2163		0.9887	0.8598	0.8644	4.2894		-0.201532	-0.193834	2.11717		0.1299	0.2025	2.2449e-05		0.886391	0.693575	4.6488		0.3007	0.2263
	187		X - 23947	X-23947		0.7325	1.0243	1.0416	0.9758	0.8007	0.8911	0.5554	0.8849	0.946	1.0289	0.7277	0.6533	0.9322	1.0242	0.8856	1.3044	0.9551	1.0625	1.5966	1.4064	1.1575	1.0418	1.2746	1.7137		0.911	0.7994	1.0273	1.3651		-0.188533	0.173335	0.583484		0.233	0.1671	0.0025		0.632644	0.777024	2.60206		0.3903	0.1992
	179		X - 23782	X-23782		0.6411	1.039	1.0818	0.8287	1.2165	1	0.1494	0.1494	0.5891	1.3171	1.3756	1.2472	1.9731	1.4493	0.9439	0.255	0.7288	1.3264	1.4642	1.7905	0.9236	0.9634	0.5715	0.5465		0.9678	0.8046	1.1127	1.0433		-0.266437	0.201284	0.108373		0.2805	0.9639	0.9983		0.552067	0.015968	0.000738929		0.4123	0.5493
	159		X - 23440	X-23440		1.017	0.7878	1.1956	0.8534	0.8442	1.0642	0.7273	0.9163	0.9461	0.9715	0.8571	0.8213	1.3475	1.141	0.983	1.328	1.1824	0.8025	1.4914	1.4732	0.7279	1.3036	1.2245	1.2657		0.9604	0.8733	1.1307	1.2477		-0.137158	0.235509	0.377564		0.2927	0.1595	0.0852		0.533577	0.797239	1.06956		0.4123	0.1949
	160		X - 23447	X-23447		0.8871	0.9836	1.1223	1.0164	0.9093	1.0886	0.7146	0.8605	1.0395	1.1813	0.8056	0.9111	0.9566	0.9814	1.0436	0.8635	0.9761	0.8921	1.2159	1.5708	1.2233	1.0624	1.2976	1.5376		1.0012	0.9188	0.9522	1.3179		-0.123907	-0.0723937	0.396511		0.283	0.3352	0.0054		0.548214	0.474696	2.26761		0.4123	0.3055
	161		X - 23470	X-23470		0.9178	0.9981	1.0348	0.7326	0.7649	0.9622	0.5463	0.7975	0.8538	1.2596	0.6304	0.7118	1.2933	1.2675	1.0019	1.0565	1.1173	0.7302	1.2495	1.3735	0.8937	1.1474	1.3347	2.0492		0.9017	0.7999	1.0778	1.3414		-0.172828	0.25737	0.57302		0.297	0.1349	0.0186		0.527244	0.869988	1.73049		0.4132	0.1756
	172		X - 23610	X-23610		0.8345	0.9026	1.1718	1.0872	0.6185	0.939	0.7567	0.736	0.9558	0.8578	0.5952	0.669	1.349	0.9353	1.1222	1.4536	1.2313	0.7665	1.6731	1.427	1.075	1.0442	1.3637	1.8542		0.9256	0.7618	1.143	1.4062		-0.280977	0.304365	0.603341		0.138	0.1524	0.0101		0.860121	0.817015	1.99568		0.3007	0.189
	178	Unknown lipids Group II	X - 23780	X-23780		0.9412	1.0544	0.8745	0.7489	1.2062	0.6436	1.8288	1.7558	1.7121	1.1491	1.385	1.1473	0.2522	1.1664	1.0245	1.1858	0.591	1.3896	0.7696	0.804	0.9755	0.621	0.7439	0.9156		0.9115	1.4964	0.9349	0.8049		0.715181	0.0365694	-0.179433		0.0029	0.7573	0.3442		2.5376	0.120732	0.463189		0.0655	0.4866
	182		X - 23906	X-23906		0.7986	0.9759	1.049	0.9439	0.781	0.8797	1.2359	1.4801	1.3378	1.3991	0.9802	1.1529	0.8699	1.1399	1.0489	1.5879	0.9831	0.9226	0.9952	1.0787	0.9047	0.8991	1.0048	1.0205		0.9047	1.2643	1.092	0.9838		0.482827	0.271461	0.120926		0.0018	0.1231	0.1535		2.74473	0.909742	0.813892		0.0549	0.1679
	184		X - 23911	X-23911		0.8734	0.9821	0.9646	0.898	1.0155	1.0386	1.0973	0.9019	1.2192	1.4537	1.0684	1.1131	1.1058	1.1491	1.0983	1.2008	1.099	0.9845	0.8407	0.8817	0.7862	0.9215	0.9406	0.8572		0.962	1.1423	1.1062	0.8713		0.247833	0.201503	-0.142867		0.0539	0.0048	0.0281		1.26841	2.31876	1.55129		0.2029	0.022
	163		X - 23512	X-23512		0.6843	0.8359	0.8878	1.0249	0.7827	0.8727	1.0987	1.3268	1.1313	1.0672	1.0613	0.8884	0.8779	0.9664	1.1598	1.1804	0.9921	0.9459	1.2437	1.0079	0.7775	0.8623	1.306	1.0408		0.848	1.0956	1.0204	1.0397		0.369585	0.266999	0.294031		0.0071	0.0292	0.0819		2.14874	1.53462	1.08672		0.0943	0.0641
	164		X - 23522	X-23522		0.635	0.7618	0.8781	0.9223	0.6628	0.8012	1.2383	1.4118	1.094	1.0315	1.0316	0.7634	0.9452	1.0299	1.7913	1.2763	1.0678	1.8396	1.1479	0.9701	0.8282	0.9468	1.3358	0.9585		0.7768	1.0951	1.325	1.0312		0.495448	0.770377	0.408709		0.0105	0.0057	0.0124		1.97881	2.24413	1.90658		0.0943	0.023
	176		X - 23734	X-23734		0.6961	0.7165	0.6785	1.0068	0.7114	0.6478	0.9129	0.9932	1.4484	0.5879	1.0424	0.9589	0.6417	0.8437	1.3839	0.2144	1.1504	1.6244	8.8322	1.7709	5.377	3.0298	5.8351	5.4971		0.7429	0.9906	0.9764	5.057		0.415135	0.394304	2.76704		0.0859	0.7389	0.0003		1.06601	0.131414	3.52288		0.2488	0.4831
	173		X - 23624	X-23624		0.6921	0.6362	1.1842	0.8318	0.5333	0.4149	0.7155	0.809	0.9883	0.8619	0.8081	0.6966	0.4798	1.2104	1.5887	1.4613	1.264	1.4834	1.972	1.5935	1.0683	1.0117	1.6804	1.8663		0.7154	0.8133	1.2479	1.532		0.185037	0.80268	1.09859		0.3006	0.0439	0.0022		0.522011	1.35754	2.65758		0.4133	0.085
	180		X - 23805	X-23805		0.7869	0.8674	0.8251	1.0217	0.761	0.8545	1.1717	1.1493	0.887	0.5002	1.0021	1.0056	0.8867	1.2602	0.9693	1.0693	0.963	0.9979	1.5668	1.1729	1.4246	0.8689	1.7652	1.2603		0.8528	0.9526	1.0244	1.3431		0.159663	0.2645	0.655287		0.5791	0.0192	0.0062		0.237246	1.7167	2.20761		0.5055	0.05
	194		X - 24455	X-24455		0.6264	0.9827	0.691	0.6584	0.9237	0.5974	1.0173	0.7809	0.8106	0.5721	0.861	1.0865	0.9452	1.5007	1.8506	0.8066	1.3226	1.4684	10.9297	7.5628	7.7319	6.153	10.6708	12.9163		0.7466	0.8547	1.3157	9.3274		0.195083	0.817423	3.64307		0.3149	0.0063	2.0476e-08		0.501827	2.20066	7.68875		0.4176	0.0244
	195		X - 24456	X-24456		0.5406	0.758	0.7761	0.692	0.7326	0.6398	0.9352	0.7563	0.8284	0.3559	0.8026	0.9866	1.1159	1.8623	2.0081	1.0134	1.6907	1.4355	6.8048	4.1689	5.1023	2.8573	9.2126	7.642		0.6899	0.7775	1.521	5.9646		0.172455	1.14056	3.11197		0.6442	0.0004	2.9198e-05		0.190979	3.39794	4.53465		0.5369	0.0051
	207		X - 25881	X-25881		0.5776	1.311	1.1394	0.2801	0.8033	0.2663	7.6491	0.6941	0.8664	0.3245	1.4145	0.5086	1.0739	3.7193	3.0078	1.9428	2.1753	3.0118	0.8226	0.7056	1.1385	0.7229	1.6172	0.9261		0.7296	1.9095	2.4885	0.9888		1.38802	1.7701	0.438573		0.3684	0.0035	0.198		0.43368	2.45593	0.703335		0.4263	0.0177
	208		X - 25882	X-25882		0.9378	1.6759	2.0638	0.388	0.7321	0.3076	6.5865	0.9574	0.8971	0.384	2.1623	0.8066	0.9301	3.3929	2.2783	1.7797	2.3358	3.396	0.9679	1.0321	1.2165	0.7406	1.5652	0.9049		1.0176	1.9656	2.3521	1.0712		0.949799	1.20878	0.0740573		0.4161	0.0276	0.4745		0.380802	1.55909	0.323764		0.4369	0.0618
	174		X - 23639	X-23639		0.9321	0.8007	0.7826	0.9866	0.9769	0.6935	1.0408	1.0134	0.9801	0.725	1.1702	1.6769	1.0501	1.8121	1.3894	1.0502	1.3797	1.46	0.7508	1.4553	0.9087	0.498	0.8849	1.0259		0.8621	1.1011	1.3569	0.9206		0.353018	0.654387	0.0947192		0.1191	0.0021	0.8857		0.924088	2.67778	0.0527134		0.2973	0.0136
	185		X - 23921	X-23921		0.793	0.9429	1.2062	1.0252	0.7257	0.8588	0.9162	1.1317	0.897	1.2722	0.8321	0.8808	1.0914	1.2286	1.0224	1.1686	1.3564	0.8398	0.9776	1.2244	0.8479	0.959	1.1901	1.1992		0.9253	0.9883	1.1179	1.0664		0.0950278	0.272798	0.204756		0.5167	0.0868	0.1638		0.286762	1.06148	0.785686		0.4738	0.138
	204		X - 25853	X-25853		1.0613	0.8712	0.9579	0.9922	0.7914	0.9724	0.8484	0.94	1.093	0.6728	1.027	1.1851	0.9436	1.1631	1.2238	0.9056	1.1289	1.081	1.0078	1.0237	0.9041	0.585	1.1506	1.2187		0.9411	0.9611	1.0743	0.9817		0.0303385	0.190977	0.0609342		0.9256	0.0714	0.8639		0.0335767	1.1463	0.0635365		0.5973	0.1218
	193	Unknown lipids Group III	X - 24432	X-24432		1.331	1.7187	0.883	1.0191	1.7569	1.8368	0.7047	0.7507	0.966	1.4318	1.0588	0.9447	1.705	1.0039	0.9961	1.2348	1.7742	2.2788	0.4615	0.3161	0.7158	0.806	0.7638	0.369		1.4242	0.9761	1.4988	0.572		-0.545051	0.0736561	-1.31606		0.0497	0.8298	0.0013		1.30364	0.0810266	2.88606		0.1973	0.5119
	203		X - 25797	X-25797		0.9944	1.0005	0.9995	1.0392	1.0597	1.0266	0.8978	0.9454	1.0014	0.8446	0.9621	0.946	1.2386	1.0982	1.0494	0.9774	0.9942	1.0259	0.9903	1.0291	0.9151	0.6234	1.0575	1.1893		1.02	0.9329	1.064	0.9675		-0.128775	0.060929	-0.0762356		0.0117	0.3277	0.4688		1.93181	0.484524	0.329012		0.0943	0.3007
	205		X - 25855	X-25855		1.1326	0.8957	0.9954	1.1113	0.9512	1.1845	0.804	0.9297	0.9572	0.6064	0.9449	0.962	1.1589	1.2777	1.22	0.9803	1.0774	1.0301	1.1622	0.9732	1.0046	0.5848	1.3014	1.0801		1.0451	0.8674	1.1241	1.0177		-0.268872	0.105129	-0.0383286		0.0548	0.2587	0.6922		1.26122	0.587204	0.159768		0.2038	0.2653
	166		X - 23536	X-23536		1.2592	1.019	1.2337	1.5066	0.8482	0.896	0.7466	0.8959	1.4317	1.8832	0.8107	1.0504	0.6072	0.7671	0.7685	0.99	0.6029	0.8116	1.4728	1.1932	1.2442	0.6298	1.01	1.5212		1.1271	1.1364	0.7579	1.1785		0.0118552	-0.572536	0.0643362		0.8763	0.0083	0.8758		0.0573472	2.08092	0.0575951		0.5825	0.028
	162		X - 23484	X-23484		1.0032	1.3194	1.2956	1.4527	0.9339	1.086	0.861	0.9968	1.2377	1.1535	0.8286	0.8663	0.8133	0.7799	0.7717	1.0708	0.7888	0.7196	1.1201	1.068	1.0997	0.8497	0.9828	1.4972		1.1818	0.9907	0.824	1.1029		-0.254466	-0.52027	-0.0996839		0.1056	0.0031	0.5084		0.976336	2.50864	0.293794		0.2708	0.0171
	189		X - 23974	X-23974		0.69	1.0247	1.344	1.2527	0.8555	0.8651	0.7537	1.2187	1.276	1.0862	0.8901	0.9753	0.9322	0.8361	0.9326	1.1146	0.9578	0.4691	1.1296	1.5358	1.1931	0.7499	1.0803	1.6086		1.0053	1.0333	0.8737	1.2162		0.0396331	-0.202416	0.274754		0.7796	0.3823	0.2503		0.108128	0.417596	0.601539		0.5659	0.3245
	165		X - 23528	X-23528		0.96	1.1242	1.1718	1.318	1.0916	1.1614	0.9032	1.2089	1.1043	1.2188	0.9954	0.942	1.0688	0.9348	0.8846	1.179	0.9307	1.0005	0.9995	0.9708	0.7262	0.7192	1.0747	0.8349		1.1378	1.0621	0.9997	0.8876		-0.0993274	-0.18668	-0.358265		0.3147	0.0575	0.0134		0.502103	1.24033	1.8729		0.4176	0.1044
	167		X - 23549	X-23549		1.0105	1.2277	1.3766	1.241	1.1913	1.3128	0.8158	1.4047	1.2019	1.3994	1.0479	0.9647	1.0678	0.9744	0.7681	1.188	0.9895	0.8647	0.7238	0.7872	0.5936	0.6604	0.9738	0.6774		1.2267	1.1391	0.9754	0.736		-0.106888	-0.330717	-0.737005		0.396	0.0135	0.0002		0.402305	1.86967	3.69897		0.432	0.0391
	168		X - 23557	X-23557		0.8342	0.743	1.0511	1.0509	0.861	1.2657	0.8238	0.7507	0.9294	1.3503	0.8026	1.038	1.6608	1.021	1.1082	0.9821	1.2714	0.7906	0.8141	1.016	0.984	1.1185	0.7333	1.1534		0.9677	0.9491	1.139	0.9699		-0.0279998	0.235136	0.00327615		0.8448	0.272	0.9622		0.0732461	0.565431	0.0167346		0.5825	0.2741
	169		X - 23576	X-23576		1.0499	1.0036	1.3309	1.3233	0.8434	1.2159	0.5551	1.0824	1.1757	1.2612	0.7374	0.9964	0.9094	0.7825	0.9855	1.052	0.8141	0.8234	1.1722	0.992	1.0108	0.8	0.8661	1.4364		1.1278	0.968	0.8945	1.0463		-0.220432	-0.334358	-0.108215		0.2638	0.0314	0.4901		0.578725	1.50307	0.309715		0.4067	0.0674
	170		X - 23578	X-23578		1.0484	1.0315	1.1622	1.1381	0.9868	0.9356	0.8974	1.0218	1.5483	1.3808	0.9123	0.9817	0.8311	0.8268	1.0132	1.0154	0.9033	1.0537	1.1343	0.847	0.8776	0.658	0.9125	1.0837		1.0504	1.1237	0.9406	0.9189		0.0973181	-0.159286	-0.192959		0.6498	0.0717	0.1363		0.18722	1.14448	0.865504		0.5369	0.1218
	171		X - 23580	X-23580		0.9108	1.267	1.1309	1.1134	1.1862	1.3167	0.5539	1.2502	1.6812	1.8311	1.2889	0.6277	0.9799	0.7175	0.6201	1.1814	1.3766	0.7869	0.5438	0.7751	0.5704	0.3758	0.8113	1.0201		1.1542	1.2055	0.9437	0.6828		0.0627384	-0.290493	-0.757358		0.8369	0.1306	0.0094		0.0773264	0.884057	2.02687		0.5816	0.1725
	175		X - 23728	X-23728		1.2047	1.0723	1.019	1.0868	1.0629	1.0173	1.1859	0.9521	1.0638	0.6624	0.966	1.152	1.0439	1.325	1.132	0.9189	0.9827	0.946	0.5936	0.907	0.8131	0.5461	0.7087	0.8554		1.0772	0.9971	1.0581	0.7373		-0.111476	-0.0258102	-0.546962		0.3422	0.7036	0.0043		0.46572	0.152674	2.36653		0.4263	0.4691
	177		X - 23738	X-23738		1.0887	1.0041	1.1837	1.2512	1.029	1.1098	1.1764	1.1584	1.2432	0.7486	1.0586	1.2391	0.8162	1.2233	0.9848	0.757	0.9959	0.9279	0.7354	0.8238	0.7037	0.438	0.6416	0.9143		1.1111	1.104	0.9508	0.7095		-0.00924849	-0.224775	-0.647114		0.8431	0.0671	0.0051		0.0741209	1.17328	2.29243		0.5825	0.117
	183		X - 23908	X-23908		1.504	1.6448	1.7733	2.0469	1.0195	1.3449	1.1733	1.0618	1.83	2.1639	1.006	1.3666	0.5182	0.5797	0.7228	0.6792	0.5935	0.5979	0.7057	0.7342	0.9282	0.6534	0.3096	0.994		1.5556	1.4336	0.6152	0.7209		-0.117829	-1.33834	-1.1096		0.5498	5.9565e-05	0.0034		0.259795	4.22501	2.46852		0.4948	0.0011
	186		X - 23933	X-23933		1.1589	1.0429	1.205	1.1348	1.0242	1.0841	0.6121	1.0325	1.0346	1.4428	0.6793	0.8721	0.8294	0.7513	0.8139	0.918	0.7615	0.8357	1.2525	1.0923	0.9099	0.6215	0.9758	1.1416		1.1083	0.9456	0.8183	0.9989		-0.229047	-0.437647	-0.149936		0.1845	1.756e-05	0.2765		0.734004	4.75548	0.558305		0.3362	0.0007
	188		X - 23961	X-23961		1.1349	1.4268	1.3191	1.2026	1.1078	0.979	0.7144	1.4798	1.5195	1.6151	0.9654	0.8051	0.8401	0.8776	0.8622	1.3005	1.021	1.0399	0.9069	0.709	0.6306	0.5174	0.928	1.1243		1.195	1.1832	0.9902	0.8027		-0.0143167	-0.271219	-0.574078		0.7403	0.0523	0.0131		0.130592	1.2815	1.88273		0.5602	0.0963
	190		X - 24210	X-24210		1.5022	0.9532	1.2393	0.9191	1.1655	1.1796	1.0239	1.1283	1.0396	2.1348	1.5635	1.3715	1.6248	0.7454	0.7611	0.9218	1.3389	0.807	0.5672	0.6113	0.6226	0.4031	0.9761	0.6716		1.1598	1.3769	1.0332	0.642		0.247548	-0.166756	-0.853231		0.3083	0.3579	0.0019		0.511026	0.446238	2.72125		0.4175	0.3173
	198		X - 24752	X-24752		1.6605	1.4437	0.8501	0.8818	1.5526	1.7662	0.4959	0.611	0.6405	1.551	1.0511	1.4093	1.7572	1.2566	0.8747	0.8182	1.8398	1.1596	0.6143	0.6652	0.6212	0.4863	1.1758	0.9489		1.3591	0.9598	1.2843	0.752		-0.501846	-0.0816694	-0.853847		0.1241	0.7483	0.0097		0.906228	0.125924	2.01323		0.3007	0.4851
	199		X - 24984	X-24984		0.6384	0.9407	1.0164	1.0289	1.2239	1.1872	0.889	1.5966	0.9249	1.3458	1.0869	1.3527	1.1465	0.9842	1.1	1.0055	1.2158	0.2976	0.7888	0.8123	0.8696	0.2253	0.9945	0.7001		1.0059	1.1993	0.9583	0.7317		0.253706	-0.0699376	-0.459163		0.2263	0.6382	0.151		0.645315	0.195043	0.821023		0.3881	0.4427
	200		X - 25222	X-25222		1.0286	1.0567	0.9992	1.008	1.0463	0.9651	1.1423	1.0273	0.9719	0.6355	0.9281	1.1669	0.911	1.1658	1.0111	1.0008	1.2183	1.036	0.6726	0.746	0.7046	0.4286	0.8452	0.8397		1.0173	0.9787	1.0572	0.7061		-0.0558066	0.0555031	-0.526801		0.5581	0.4836	0.0123		0.253288	0.315514	1.91009		0.4971	0.3749
	192		X - 24431	X-24431		1.3209	0.5914	0.9536	1.0341	0.5914	0.5914	0.8441	1.0112	0.5914	1.1833	1.0558	1.1008	0.5914	1.2358	0.953	0.5914	0.5914	0.5914	0.5914	0.6542	0.9494	0.5914	1	0.7112		0.8471	0.9644	0.7591	0.7496		0.187099	-0.158242	-0.176411		0.397	0.6054	0.6042		0.401209	0.217958	0.218819		0.432	0.4279
	197		X - 24699	X-24699		0.9089	0.9161	0.9859	0.9929	1.0091	1.0071	0.9706	1.0769	1.1223	0.6505	0.9167	0.9392	0.902	1.2727	1.0182	0.9439	1.0091	0.8958	1.3487	1.3959	1.0818	0.6815	1.2223	1.2479		0.97	0.946	1.0069	1.163		-0.0361446	0.0538638	0.261794		0.6524	0.6032	0.2098		0.185486	0.219539	0.678195		0.5369	0.4276
	201		X - 25259	X-25259		0.8022	0.8708	1.2805	0.923	0.8049	0.7256	0.7256	0.9645	1.3291	1.2563	0.8733	0.7256	0.7256	1.1	1.0155	0.7256	0.7256	1.0545	1.3143	1.0906	0.8113	0.7256	0.9845	2.1236		0.9012	0.9791	0.8911	1.175		0.119609	-0.01626	0.382742		0.6067	0.9235	0.2589		0.217026	0.0345631	0.586868		0.5248	0.5425
[truncated: 1 more columns]

## Sheet: TableS2 Changes in sub-pathways
	Piebiep Goufo and Isabel Cortez A lipidomic analysis of leaves of esca-affected grapevine suggests a role for galactolipids in the triggering of foliar symptom appearance
	Sub-pathway No	Sub-pathway		Sum of Scaled Imputed Values of all Compounds in a Sub-pathway																									Mean Values (Scaled Imputed Data)					Fold2 of Change (Ratios of Group means in Scaled Imputed Data)				P-values (From log-trasnfromed Scaled Imputed Data)				Number of lipid species with increasel levels in pairwise comparisons				Number of lipid species with decreasel levels in pairwise comparisons
				CTL	CTL	CTL	CTL	CTL	CTL	ASY	ASY	ASY	ASY	ASY	ASY	SY1	SY1	SY1	SY1	SY1	SY1	SY2	SY2	SY2	SY2	SY2	SY2		CTL	ASY	SY1	SY2		ASY/CTL	SY1/ CTL	SY2/ CTL		ASY/CTL	SY1/ CTL	SY2/ CTL		ASY/CTL	SY1/ CTL	SY2/ CTL		ASY/CTL	SY1/ CTL	SY2/ CTL
	01	Fatty acids, free unsaturated		25.3577	27.6225	25.0411	26.4425	25.7236	27.19	21.5076	22.1124	21.9445	25.1174	21.8175	23.6715	22.767	24.1607	23.9124	23.7534	22.9723	23.7484	38.0782	38.6921	38.2789	40.1102	38.3442	39.7203		26.2262	22.699	23.5485	38.8639		-0.20838	-0.155374	0.567422		0.0005711	0.0002292	0		3	2	4		7	10	2
	02	Fatty acids, free saturated		75.0505	73.1387	76.0391	74.2484	75.5448	73.6936	79.1258	78.892	78.3489	75.4787	78.7373	77.1854	78.2286	76.975	77.5691	77.4318	77.8989	77.2034	64.1395	63.5395	63.0621	62.252	64.0558	62.8958		74.6275	77.9675	77.56	63.335		-0.0631655	-0.0631655	-0.236704		0.0010128	0.0001418	0.0921		2	5	4		8	8	6
	03	Fatty acid, hydroxy		5.9305	7.575	6.9462	6.8829	7.391	8.0759	6.2505	9.0564	6.9404	7.7344	7.4207	8.4378	7.3651	6.5024	5.765	6.3268	7.237	5.5692	7.397	8.3702	6.5542	6.2825	6.3433	6.9834		7.1337	7.64	6.4609	6.9885		0.0989221	-0.142915	-0.0296677		0.344444	0.100386	0.749651		0	0	2		0	2	2
	04	Fatty acid amide, amino		2.8885	2.9352	2.6158	2.3287	2.7376	3.3483	3.2812	3.0424	2.7061	3.2717	2.961	2.7872	3.0052	3.3371	2.9726	2.9729	3.2153	2.474	4.4821	4.5358	3.6145	2.9598	3.3687	5.8032		2.809	3.0083	2.9962	4.1274		0.0988918	0.0930773	0.555177		0.270062	0.334977	0.0243308		1	0	1		0	0	0
	05	Fatty acid, dicarboxylate		8.5885	9.2492	7.1472	8.2741	8.0644	10.1319	7.5972	7.2621	7.8127	9.0113	7.9287	7.9031	8.6744	9.5052	10.219	8.2006	8.0185	7.2517	18.8731	26.0953	15.4883	22.1329	15.3699	15.672		8.576	7.9192	8.6448	18.9386		-0.11495	0.0115277	1.14295		0.204102	0.911584	0.0017658		0	1	8		2	1	0
	06	Phospholipids		22.3821	20.1464	21.5797	17.0597	19.3704	20.7869	14.9319	23.1036	21.7972	27.614	22.1013	25.5208	26.9816	22.1789	26.1583	25.3871	27.8307	11.9525	31.5228	29.4177	32.2753	16.5269	36.5511	39.596		20.221	22.5117	23.4146	30.9818		0.154821	0.211554	0.615567		0.261483	0.256038	0.0203681		3	2	15		0	1	1
	07	Lyso-phospholipids		7.528	6.818	9.3956	6.3414	9.0122	12.9159	7.1057	7.8023	8.8618	7.3039	8.2734	6.9357	9.0042	9.4095	10.5586	10.4751	7.2767	5.5368	25.9043	49.154	26.1479	15.4394	33.8465	28.9553		8.6685	7.7139	8.71	29.9077		-0.168322	0.00689035	1.78666		0.388468	0.974407	0.0049491		0	0	10		0	0	0
	08	Phospholipid metabolism		7.0009	5.5359	6.975	6.6999	4.6361	7.4748	4.6661	6.1878	7.0838	5.5169	6.0097	6.8196	4.9781	7.6991	9.2958	8.2438	4.5288	7.3897	12.5847	11.3294	12.7739	8.3328	10.3316	13.1053		6.3871	6.0473	7.0225	11.4096		-0.0788699	0.136824	0.837015		0.562925	0.488702	0.0001745		0	1	7		2	0	0
	09	Choline metabolism		4.1904	4.8201	4.8589	3.793	5.7085	4.6731	5.2323	3.3428	4.0576	2.8458	4.1151	3.8141	3.797	5.3361	4.473	3.9713	3.4066	4.0293	4.0675	3.6506	3.9237	2.6326	4.3753	4.6942		4.674	3.9014	4.1688	3.8907		-0.260666	-0.165026	-0.264628		0.098866	0.215069	0.175694		0	1	1		1	0	2
	10	Glycerolipids, monoacyl		2.9242	3.302	2.8294	2.6932	6.7426	11.0335	4.0416	2.7616	2.6551	2.9711	3.9771	4.0027	9.4996	6.9207	3.9538	3.3063	2.9588	3.1466	5.4687	22.8159	9.8562	18.0624	11.9958	17.0026		4.9207	3.4015	4.9643	14.2002		-0.532692	0.0127267	1.52898		0.324211	0.980691	0.0096276		0	0	1		0	0	0
	11	Glycerolipids, diacyl		3.2565	3.1675	2.6854	2.9028	2.7977	2.8658	3.1018	3.7947	4.6476	3.8991	3.3688	3.6587	2.2918	2.5602	2.6875	3.1761	2.6807	1.8812	3.6226	2.5597	4.1728	1.969	3.0901	3.5266		2.9461	3.7451	2.5463	3.1568		0.346198	-0.210404	0.0996565		0.0066528	0.0721072	0.555153		3	0	1		0	2	0
	12	Galactolipids		12.8219	15.1594	13.4919	12.878	14.1272	13.0743	15.6854	14.8437	16.096	16.5584	13.8449	15.198	11.4063	13.2491	13.4983	12.8633	14.2308	9.2839	11.1287	10.8271	11.0819	8.7332	13.0144	11.7471		13.5919	15.371	12.4219	11.0886		0.177464	-0.129861	-0.29367		0.0082128	0.085432	0.0042477		6	1	1		0	8	9
	13	Lyso-galactolipids		4.4995	6.1052	3.852	2.886	8.0051	11.1391	7.8847	4.9113	4.1518	4.5828	6.7719	6.1767	10.4	7.4125	5.4153	4.3899	6.3277	4.0516	2.5337	2.3609	3.3668	3.5932	4.1971	2.0013		6.0812	5.7467	6.3329	3.0089		-0.0816223	0.0585103	-1.01512		0.813688	0.876282	0.0575069		0	0	0		0	0	4
	14	Sphingolipids		4.732	5.9292	6.3296	6.0301	6.0854	6.2486	6.0456	6.1199	6.5387	5.8902	5.9809	5.3003	3.4382	6.7484	9.0865	7.3601	5.0007	4.8079	6.949	4.6742	6.5289	4.6414	6.2908	6.84		5.8924	5.9792	6.0737	5.9873		0.0210971	0.0437203	0.0230502		0.771102	0.841817	0.851245		2	0	1		1	0	1
	15	Sterols		3.5489	2.8095	2.8822	3.0989	2.8739	2.9484	2.3716	3.1847	3.3324	3.7688	2.8397	3.2044	2.1839	2.7345	3.1967	3.3583	2.6243	1.7444	3.5097	3.3954	2.6961	1.4229	3.1204	4.0638		3.027	3.117	2.6403	3.0348		0.0422695	-0.197187	0.00371277		0.695074	0.185731	0.984712		0	0	0		0	1	0
	16	Sulfolipids		2.4531	2.705	2.2935	2.0393	3.0226	3.9166	3.4826	2.4185	2.4022	2.2912	2.444	2.3485	2.4552	2.9805	2.1651	2.3102	2.4539	1.5415	1.6725	4.0716	4.2716	3.124	4.3008	2.1051		2.7384	2.5646	2.3176	3.2576		-0.0945994	-0.240702	0.250476		0.609674	0.236121	0.0836227		0	0	1		0	1	2
	17	Carnitine metabolism		4.8041	4.472	4.6993	5.4002	5.4309	5.117	4.9635	6.1696	5.3929	4.3892	5.1725	5.8865	3.7509	5.9385	4.9472	4.9504	4.0713	5.1649	6.2255	9.0739	6.4914	4.271	5.9854	8.0224		4.9873	5.3291	4.8038	6.6782		0.0956329	-0.0540829	0.4212		0.291742	0.620782	0.0563065		1	1	2		1	0	0
	18	Tocopherol metabolism		3.191	4.0501	0.8948	5.0777	3.8747	3.8472	2.5147	1.3862	5.1232	0.7685	4.4084	1.4012	4.0733	2.4133	5.3261	4.7489	2.5758	4.268	6.6507	1.4803	3.1597	2.4028	2.2862	3.483		3.4893	2.6005	3.9009	3.2438		-0.424149	0.160869	-0.105253		0.360795	0.594526	0.798665		0	0	0		0	0	0
	19	Chlorophyll metabolism		6.8254	6.5659	6.4036	6.5564	9.5813	14.0734	6.9198	7.476	6.3898	7.9939	7.1539	9.0949	9.7719	11.0618	7.9288	6.42	6.735	5.2165	6.3371	7.8468	11.3002	7.0535	8.3482	6.6588		8.3343	7.5048	7.8557	7.9242		-0.151247	-0.0853212	-0.172796		0.549266	0.762117	0.0278329		0	0	1		0	1	4
	20	Hormone metabolism		2.5181	3.4657	2.9	2.4051	2.4927	2.5832	3.1806	2.9024	3.1757	4.7129	3.7572	3.8541	5.4981	6.2666	5.8644	6.2856	7.6554	6.7866	10.5669	9.2081	8.2804	6.3185	11.4483	12.2492		2.7276	3.5972	6.3928	9.6785		0.399242	1.22882	1.82715		0.0199715	1e-06	0.0004551		1	4	4		0	0	0
	21	Unknown lipids Group I		9.1685	10.5179	11.1543	10.0346	9.3477	10.5712	7.9253	8.5741	9.528	10.1799	8.7736	9.1912	13.7261	13.3149	11.8845	12.4824	12.6788	11.6179	21.5732	17.8507	14.8958	13.519	17.1012	18.5718		10.1323	9.0289	12.6173	17.252		-0.16634	0.316442	0.767802		0.0335756	0.0002768	0.0012112		0	4	8		0	0	0
	22	Unknown lipids Group II		11.5764	14.1726	14.9588	12.4208	12.1396	10.4888	28.2926	16.1017	16.1907	12.3571	16.6488	14.8573	13.2094	23.445	22.8451	17.8431	19.4998	22.8804	39.6293	26.4525	29.9919	21.6769	40.9032	39.2494		12.6263	17.408	19.9536	32.9837		0.463319	0.660217	1.38532		0.0907561	0.0019461	0.0013319		6	12	7		0	0	1
	23	Unknown lipids Group III		26.1771	26.3385	27.7998	28.0764	25.2028	27.0604	20.2705	25.5563	27.8216	30.8373	23.4304	24.7961	24.6793	23.5373	22.3673	23.5466	24.7744	21.8442	21.8156	21.7453	20.5811	14.8937	22.3296	25.7439		26.7757	25.452	23.4581	21.185		-0.0731453	-0.190838	-0.337881		0.425774	0.0004893	0.010355		0	0	0		3	10	11
[truncated: 9 more columns]
